# Supplementary material
Source: publisher figshare collection journal article supplement (https://gsajournals.figshare.com/ndownloader/files/15023639)
Supplement: Supplementary file 1 [file 15023639]

#
#
# ANALYZE GENETIC MAPS FROM JOHN CRANDALL'S ADVENTURES IN LEPMAP
#   NUMBERS AFTER 'cM_' IN DATA FIELDS REFER TO ESTIMATED ERROR
#   RATES IN LEPMAP
#

# ENTER THE PATH TO THE MAIN DIRECTORY FOR THIS PROJECT

baseDIR    <-    "/Users/thom/Dropbox/1.Shared_with_Bill/9.Manuscripts/2.RecombinationLandscape/"

# maps    <-    read.table(
              # paste0(baseDIR,"/4.data/1.datasets/maps_old.tsv"), sep = "\t",header= TRUE,
              # stringsAsFactors = FALSE)

maps    <-    read.table(
              paste0(baseDIR,"/4.data/1.datasets/all_maps.tsv"), sep = "\t",header= TRUE,
              stringsAsFactors = FALSE)
        maps$Mb <- maps$bp / 1000000


popgen    <-    read.table(paste0(baseDIR,
                    "/4.data/1.datasets/polymorphism_withInterpolation.tsv"), 
                    sep = "\t", stringsAsFactors = FALSE, header = TRUE)
    popgen            <-    popgen[popgen$chr %in% as.character(1:21),]
    popgen$Mb        <-    popgen$bp / 1000000
    chr                <-    as.character(popgen$chr)
    bp                <-    as.character(popgen$bp)
    coord            <-    paste0(chr,"_",bp)
    popgen$coord    <-    coord
    popgen    <-    popgen[order(popgen$chr, popgen$bp),]
    popgen$fst.rsbt[popgen$fst.rsbt > 1]  <- 0


RS21.ref.order    <-    read.table(paste0(baseDIR,"/4.data/1.datasets/RS21_unflipped.tsv"),
                                sep = '\t', header = T)

LGs.info    <-    read.table(paste0(baseDIR,"/4.data/1.datasets/GacNewLGs.tsv"), sep = "\t", 
                        header = TRUE, stringsAsFactors = FALSE)
group    <-    2    # ***column in which to find 'group' label (You specify)
bp        <-    3    # ***column in which to find chromosome-specific bp position (You specify)

# FUNCTION TO SCALE AN ARBITRARY VECTOR OF NUMERICAL VALUES TO A GIVEN MIN/MAX

scale.vals    <-    function(vals, min, max) {
    # 1) SUBTRACT MIN VAL SO START AT ZERO
    # 2) SCALE THE DATA RANGE SO RANGE.VALS == RANGE.SCALE
    # 3) ADD BACK MIN.SCALE TO VALS.SCALE
    min.scale        <-    min
    max.scale        <-    max
    min.vals        <-    min(vals, na.rm=T)
    max.vals        <-    max(vals, na.rm=T)
    range.vals        <-    max.vals - min.vals
    range.scale        <-    max.scale - min.scale
    scalar            <-    range.scale / range.vals
    vals.scale        <-    vals - min.vals
    vals.scale        <-    vals.scale * scalar
    vals.scale        <-    vals.scale + min.scale
}


# FUNCTION TO DRAW LINES SEPARATING CHROMSOMES ON 'GENOMIC' PLOTS
chr.breaks    <-    function(ybottom = 0, ytop = 1) {
    for (i in 2:length(LGs.info$groups)) {
        xright    <- LGs.info$LGs.breaks[i] / 1000000
        segments(x0 = xright, x1 = xright, y0 = ybottom, y1 = ytop,
        	col = rgb(0.5,0.5,0.5,0.5))
    }
}


# FUNCTION TO FIND AN INTERVAL OF XVALS WHERE YVALS EXCEED SOME VALUE
intervals	<-	function(vals, conditions) {
	# FIND INTERVALS - COMPARE TWO VECTORS TO COLLAPSE FIRST VECTOR
	#   INTO INTERVALS DEFINED BY OUTLIER STATUS OF THE SECOND
	#   0 = NOT OUTLIER
	#  -1 = SIGNIF. LOW
	#   1 = SIGNIF. HIGH
	
	intervals	<-	NULL
	start		<-	vals[1]
	end			<-	vals[1]
	current		<-	conditions[1]
	for (i in 2:(length(vals)-1))	{
		stat	<-	conditions[i]
		if (stat != current)	{
			end		<-	vals[i - 1]
			len		<-	end - start
			result	<-	c(start, end, len, current)
			intervals	<-	rbind(intervals,result)
			start	<-	vals[i]
			end		<-	vals[i]
			current	<-	stat
		}	
	}
	# NEED TO ADD LINES FOR LAST ENTRY IN 'VALS'
	end	<-	vals[length(vals)]
	intervals	<-	rbind(intervals, c(start,end,(end-start),current))
	rownames(intervals)	<-	NULL
	intervals	<-	data.frame(intervals)
	names(intervals)	<-	c("start","end", "len","signif")
	intervals$signif[intervals$signif == -1]	<-	'lo'
	intervals$signif[intervals$signif ==  0]	<-	'ns'
	intervals$signif[intervals$signif ==  1]	<-	'hi'
	return(intervals)

}


###~~~~~~~~~~~~~~~~~~~~~~~~~~~~~~~~~~~~~~~~~~~~~~~~~~~~~~~~~~~~~~~~~~~~~###
#
# 		RANDOMIZATION TO IDENTIFY 95% CONFIDENCE BANDS
#			FUNCTION WILL IDENTIFY GENOMIC INTERVALS
#			FALLING OUTSIDE THE X % CONFIDENCE BAND BASED
# 			ON N RANDOMIZATIONS OF Y VALUES ACROSS THE GENOMC
#
###~~~~~~~~~~~~~~~~~~~~~~~~~~~~~~~~~~~~~~~~~~~~~~~~~~~~~~~~~~~~~~~~~~~~~###

bw		<-	0.25
conf	<-	0.95
perms	<-	1000
vals	<-	popgen[popgen$chr == 1,]
xvals	<-	vals$Mb
yvals	<-	vals$fst.rsbt
ypool	<-	popgen$fst.rsbt

outliers	<-	function(xvals,yvals,ypool,conf = 0.95, perms = 1000, bw = 0.25, n.points=length(xvals), range.x = range(xvals)){
	# FUNCTIONS TO SORT VALUES AND EXTRACT VALS AT, e.g., 2.5% AND 97.5%
	# NEED TO DEFINE SEPARATELY TO INSERT INTO 'APPLY' FUNCTION
#	n.points = n.points ; range.x = range.x
	lwr	<-	(1-conf) / 2
	upr	<-	1 - lwr
	
	lim1	<-	function (x) {
		limit	<-	lwr
		test	<-	x[!(is.na(x))]
		sorted	<-	test[order(test)]
		n		<-	length(sorted)
		result	<-	round(n * limit)
		result	<-	sorted[result]
		return(result)
	}
	lim2	<-	function (x) {
		limit	<-	upr
		test	<-	x[!(is.na(x))]
		sorted	<-	test[order(test)]
		n		<-	length(sorted)
		result	<-	round(n * limit)
		result	<-	sorted[result]
		return(result)
	}
	
	# KSMOOTH REAL VALUES (& TO ID SIZE OF MATRIX NEEDED)
	est		<-	ksmooth(xvals, yvals, bandwidth = bw, kernel = 'normal',
						range.x=range.x, n.points = n.points)
	slots	<-	length(est$x)
	
	# RANDOMIZE YVALUES AND RE-SMOOTH WITH SAME X VALUES
	randos	<-	matrix(nrow = slots, ncol = perms)
	cat(paste0("\tRandomizing and re-smoothing y values ",perms," times...\n"))
	for (i in 1:perms) {
		rand	<-	sample(x = ypool, size = length(yvals), replace = FALSE)
		rand.sm	<-	ksmooth(xvals, rand, bandwidth = bw, kernel = 'normal', 
							n.points=n.points, range.x = range.x)
		randos[,i]	<-	rand.sm$y
	}
	cat(paste0("\tComputing confidence intervals for each window\n"))
	lower		<-	as.vector(apply(X=randos, MARGIN=1,FUN=lim1))
	upper		<-	as.vector(apply(X=randos, MARGIN=1,FUN=lim2))
	limits		<-	cbind(lower,upper)
	estimate	<-	as.vector(est$y)
	Mb			<-	as.vector(est$x)
	band		<-	data.frame(Mb,estimate,limits)
	# names(band)	<-	c("Mb","estimate","lower","upper")
	band$outlier	<-	rep(0,dim(band)[1])
		band$outlier[band$estimate < band$lower]	<-	-1
		band$outlier[band$estimate > band$upper]	<-	1
	return(band)
}


###~~~~~~~~~~~~~~~~~~~~~~~~~~~~~~~~~~~~~~~~~~~~~~~~~~~~~~~~~~~~~~~~~~~~###
###                                                                    ###
###                  PERCENT OF REF GENOME COVERED                     ###
###                                                                    ###
###~~~~~~~~~~~~~~~~~~~~~~~~~~~~~~~~~~~~~~~~~~~~~~~~~~~~~~~~~~~~~~~~~~~~###

# FOR EACH CHROMOSOME, GET THE TOTAL LENGTH FROM THE REFERENCE ASSEMBLY
#   AND FIND THE FIRST/LAST POSITION OF MAP MARKERS

# DATA FRAME: CHR, LEN, SPAN.BT, SPAN.RS, SPAN.H

crosses    <-    c("Bt_Subset","RS","Hybrid_Subset")
chrs    <-    1:21

ref.cov    <-    matrix(nrow = 21, ncol = 4)

for (i in chrs)    {
    result    <-    1:4
    chr    <-    i
    len    <-    LGs.info$LGs.len[LGs.info$groups == chr]
    result[1]    <-    len
    for (j in 1:3) {
        x    <-    crosses[j]
        c    <-    j + 1
        l    <-    maps$bp[maps$map == x & maps$chr == chr]
        l    <-    range(l) ; l    <-    l[2] - l[1]
        result[c]    <-    l
    }
    ref.cov[i,]    <-    result
}
ref.cov    <-    data.frame(ref.cov)
names(ref.cov)    <-    c("len","span.bt","span.rs","span.h")
ref.cov            <-    rbind(ref.cov, apply(ref.cov, 2, sum))


###~~~~~~~~~~~~~~~~~~~~~~~~~~~~~~~~~~~~~~~~~~~~~~~~~~~~~~~~~~~~~~~~~~~~###
###                                                                    ###
###                       PLOT PHYS/GENET DIST                         ###
###                                                                    ###
###~~~~~~~~~~~~~~~~~~~~~~~~~~~~~~~~~~~~~~~~~~~~~~~~~~~~~~~~~~~~~~~~~~~~###


data    <-    maps[maps$map == "RS",]
data    <-    maps[maps$map == "Bt_Subset",]
data    <-    maps[maps$map == "Hybrid_Subset",]

chrs    <-    as.character(1:21)

# PRINT OUT BIG-OL' PDF, ALL AXES SCALED EQUALLY
chrs    <-    c(1:18,20,21)
plotfile    <-    "ThreeMaps_scaled.pdf"
outdir        <-    paste0(baseDIR,"/3.figures/2.drafts/")
pdf(file = paste0(outdir,plotfile,sep=""), width = 8,height=10)
par(mfrow = c(5,4), mar = c(3,3,1,1)+0.1)
for (chr in chrs) {
#    chr="21"
    bt    <-    maps[maps$map == "Bt_Subset" & maps$chr == chr,]
    rs    <-    maps[maps$map == "RS" & maps$chr == chr,]
    hyb    <-    maps[maps$map == "Hybrid_Subset" & maps$chr == chr,]
    plot(bt$Mb, bt$cM, type = 'n', ylim = c(0,150), xlab = "", ylab = "", xlim = c(0,35))
        lines(bt$Mb, bt$cM, col = rgb(45/255,104/255,183/255))
        lines(rs$Mb, rs$cM, col = rgb(180/255,19/255,52/255))
        lines(hyb$Mb, hyb$cM, col = rgb(105/255,19/255,99/255))
        legend(x='topleft', legend = paste0("chr ",chr,collapse=""))
}
dev.off()


# PRINT OUT PDF EACH, SCALED
chrs    <-    c(1:18,20,21)
for (chr in chrs) {
    plotfile    <-    paste0(chr,"_threeMaps.pdf")
    outdir        <-    paste0(baseDIR,"/3.figures/2.drafts/")
    pdf(file = paste0(outdir,plotfile,sep=""), width = 4,height=4)
    bt    <-    maps[maps$map == "Bt_Subset"  & maps$chr == chr,]
    rs    <-    maps[maps$map == "RS"  & maps$chr == chr,]
    hyb    <-    maps[maps$map == "Hybrid_Subset"  & maps$chr == chr,]
    par(mar=c(2,2,0,0)+0.1)
    plot(bt$Mb, bt$cM, type = 'n', ylim = c(0,150), xlab = "", ylab = "", xlim = c(0,35))
        lines(bt$Mb, bt$cM, col = rgb(45/255,104/255,183/255))
        lines(rs$Mb, rs$cM, col = rgb(180/255,19/255,52/255))
        lines(hyb$Mb, hyb$cM, col = rgb(105/255,19/255,99/255))
        legend(x='topleft', legend = paste0("chr ",chr,collapse=""))
    dev.off()
}


###~~~~~~~~~~~~~~~~~~~~~~~~~~~~~~~~~~~~~~~~~~~~~###
###  CHR21: REF ORDER, UNCORRECTED, CORRECTED   ###
###~~~~~~~~~~~~~~~~~~~~~~~~~~~~~~~~~~~~~~~~~~~~~###

RSuncor  <-    RS21.ref.order
RScor    <-    maps[maps$chr==21 & maps$map == "RS",]
BTref    <-    maps[maps$chr==21 & maps$map == "Bt",]
         # using 'Bt' for visualization purposes only.

par(mfrow = c(1,3))
    plot(cM_01 ~ bp, BTref, pch = 20, col = 'blue3', xlim = c(9000000,12500000), ylim = c(2,12))
    plot(cM_01 ~ bp, RSuncor, pch = 20, col = 'red3', xlim = c(9000000,12500000), ylim = c(20,82))
    plot(cM_01 ~ bp, RScor, pch = 20, col = 'red3', xlim = c(9000000,12500000), ylim = c(6,18))


###~~~~~~~~~~~~~~~~~~~~~~~~~~~~~~~~~~~~~~~~~~~~~~~~~~~~~~~~~~~~~~~~~~~~###
###                                                                    ###
###                         SUMMARY STATISTICS                         ###
###                                                                    ###
###~~~~~~~~~~~~~~~~~~~~~~~~~~~~~~~~~~~~~~~~~~~~~~~~~~~~~~~~~~~~~~~~~~~~###


data    <-    maps[maps$map == "RS" ,]
data    <-    maps[maps$map == "Bt_Subset" ,]
data    <-    maps[maps$map == "Hybrid_Subset" ,]

chr.phys    <-    tapply(data$Mb, INDEX = data$chr, FUN = max)
chr.genet    <-    tapply(data$cM, INDEX = data$chr, FUN = max)
rate.means    <-    tapply(data$cMperMb, INDEX = data$chr, FUN = mean)
rate.sds    <-    tapply(data$cMperMb, INDEX = data$chr, FUN = var)

plot(chr.phys,chr.genet, pch = 21, cex = 6, bg = 'gray50',
    xlim = c(14,35), ylim = c(40,200),
    xlab = "Physical map length, Mb", ylab = "Genetic map length, cM")
    text(x = chr.phys,y = chr.genet, labels = names(chr.phys), cex = 0.75)


plot(chr.lens,rate.means, pch = 20)
plot(chr.lens,rate.sds, pch = 20)
plot(rate.means,rate.sds, pch = 20)
plot(rate.means,sqrt(rate.sds), pch = 20)


# CHROMOSOME-WIDE VARIATION IN MAP LENGTHS

chr.summaries        <-    NULL
genet.by.pop        <-    NULL
rate.by.pop            <-    NULL

pop.name    <-    "Bt_Subset"
    len.phys    <-    tapply(maps$Mb[maps$map == pop.name],         
                                INDEX = maps$chr[maps$map == pop.name], FUN = max)
    len.genet    <-    tapply(maps$cM[maps$map == pop.name],
                                INDEX = maps$chr[maps$map == pop.name], FUN = max)
    rate.mean    <-    tapply(maps$cMperMb[maps$map == pop.name],
                                INDEX = maps$chr[maps$map == pop.name], FUN = mean)
    rate.sd    <-    tapply(maps$cMperMb[maps$map == pop.name],
                                INDEX = maps$chr[maps$map == pop.name], FUN = sd)
    pop    <-    rep(pop.name, length(len.phys))
    chr    <-    names(len.phys)
    d    <-    data.frame(pop,chr,len.phys,len.genet,rate.mean,rate.sd)
    chr.summaries    <-    d
     genet.by.pop    <-    cbind(genet.by.pop, len.genet)
     rate.by.pop        <-    cbind(rate.by.pop, rate.mean)
pop.name    <-    "Hybrid_Subset"
    len.phys    <-    tapply(maps$Mb[maps$map == pop.name],         
                                INDEX = maps$chr[maps$map == pop.name], FUN = max)
    len.genet    <-    tapply(maps$cM[maps$map == pop.name],
                                INDEX = maps$chr[maps$map == pop.name], FUN = max)
    rate.mean    <-    tapply(maps$cMperMb[maps$map == pop.name],
                                INDEX = maps$chr[maps$map == pop.name], FUN = mean)
    rate.sd    <-    tapply(maps$cMperMb[maps$map == pop.name],
                                INDEX = maps$chr[maps$map == pop.name], FUN = sd)
    pop    <-    rep(pop.name, length(len.phys))
    chr    <-    names(len.phys)
    d    <-    data.frame(pop,chr,len.phys,len.genet,rate.mean,rate.sd)
    chr.summaries    <-    rbind(chr.summaries,d)
    genet.by.pop    <-    cbind(genet.by.pop, len.genet)
     rate.by.pop        <-    cbind(rate.by.pop, rate.mean)
pop.name    <-    "RS"
    len.phys        <-    tapply(maps$Mb[maps$map == pop.name],         
                                INDEX = maps$chr[maps$map == pop.name], FUN = max)
    len.genet    <-    tapply(maps$cM[maps$map == pop.name],
                                INDEX = maps$chr[maps$map == pop.name], FUN = max)
    rate.mean    <-    tapply(maps$cMperMb[maps$map == pop.name],
                                INDEX = maps$chr[maps$map == pop.name], FUN = mean)
    rate.sd    <-    tapply(maps$cMperMb[maps$map == pop.name],
                                INDEX = maps$chr[maps$map == pop.name], FUN = sd)
    pop    <-    rep(pop.name, length(len.phys))
    chr    <-    names(len.phys)
    d    <-    data.frame(pop,chr,len.phys,len.genet,rate.mean,rate.sd)
    chr.summaries    <-    rbind(chr.summaries,d)
    genet.by.pop    <-    cbind(genet.by.pop, len.genet)
     rate.by.pop        <-    cbind(rate.by.pop, rate.mean)


boxplot(len.genet ~ pop, chr.summaries, ylab = 'chromosome map length, cM', pch = 20)
    segments(x0=1, x1=2, y0=genet.by.pop[,1], y1=genet.by.pop[,2], col = rgb(0,0,0,0.5))
    segments(x0=2, x1=3, y1=genet.by.pop[,3], y0=genet.by.pop[,2], col = rgb(0,0,0,0.5))
    points(x = rep(1,length(genet.by.pop[,1])), y = genet.by.pop[,1], pch = 20)
    points(x = rep(2,length(genet.by.pop[,2])), y = genet.by.pop[,2], pch = 20)
    points(x = rep(3,length(genet.by.pop[,3])), y = genet.by.pop[,3], pch = 20)
boxplot(rate.mean ~ pop, chr.summaries, ylab = 'recombination rate, cM/Mb', pch = 20)
    segments(x0=1, x1=2, y0=rate.by.pop[,1], y1=rate.by.pop[,2], col = rgb(0,0,0,0.5))
    segments(x0=2, x1=3, y1=rate.by.pop[,3], y0=rate.by.pop[,2], col = rgb(0,0,0,0.5))
    points(x = rep(1,length(rate.by.pop[,1])), y = rate.by.pop[,1], pch = 20)
    points(x = rep(2,length(rate.by.pop[,2])), y = rate.by.pop[,2], pch = 20)
    points(x = rep(3,length(rate.by.pop[,3])), y = rate.by.pop[,3], pch = 20)
boxplot(rate.sd  ~ pop, chr.summaries, ylab = 'SD in cM/Mb')


###~~~~~~~~~~~~~~~~~~~~~~~~~~~~~~~~~~~~~~~~~~~~~~~~~~~~~~~~###
###
###      CORRELATIONS WITH POPULATION GENETICS
###
###~~~~~~~~~~~~~~~~~~~~~~~~~~~~~~~~~~~~~~~~~~~~~~~~~~~~~~~~###


### NON-OVERLAPPING GENOMIC WINDOWS

popgen    <-    read.table(paste0(baseDIR,"/4.data/1.datasets/polymorphism.tsv"), sep = "\t", stringsAsFactors = FALSE, header = TRUE)
    popgen            <-    popgen[popgen$chr %in% as.character(1:21),]
    popgen$Mb        <-    popgen$bp / 1000000
    chr                <-    as.character(popgen$chr)
    bp                <-    as.character(popgen$bp)
    coord            <-    paste0(chr,"_",bp)
    popgen$coord    <-    coord
    popgen    <-    popgen[order(popgen$chr, popgen$bp),]
    popgen$fst.rsbt[popgen$fst.rsbt > 1]  <- 0

window.size    <-    1000000 # in bp

windowed    <-    NULL
for (i in 1:21)    {
#	i = 1
    cat(paste0("Scanning chromosome ",i,"\n"))
    m        <-    maps[maps$chr == i,]
    p        <-    popgen[popgen$chr == i,]
    m.rs    <-    m[m$map == "RS",]
    m.bt    <-    m[m$map == "Bt_Subset",]
    m.h        <-    m[m$map == "Hybrid_Subset",]
    # find the highest start position among maps to avoid "NA"s
    start.min    <-    max(m.rs$bp[1],m.bt$bp[1],m.h$bp[1], na.rm=TRUE)
    # find the lowest end position among maps to avoid "NA"s
    end.min        <-    min(m.rs$bp[length(m.rs$bp)],
                        m.bt$bp[length(m.bt$bp)],
                        m.h$bp[length(m.h$bp)], na.rm=TRUE)
    # identify all start positions, use only windows with full 250kb
    starts        <-    seq(start.min,end.min,by=window.size)
    n.windows    <-    length(starts)-1
    starts        <-    starts[1:n.windows]
    # record: chr, bp.start, bp.end, bp.mid, cMperMb.bt, cMperMb.rs, cMperMb.h,
    # (mean)  pi, pi.bt, pi.rs, dxy, fst
    # = 12 columns
    for (j in starts) {
#    	j = starts[1]
        end    <-    j + (window.size - 1)
        bp.mid    <-    round((j+end)/2)

        cM.bt    <-    m.bt$cM[m.bt$bp >= j & m.bt$bp <= end]
        cMperMb.bt    <- ifelse(
            length(cM.bt) > 1, 
            (max(cM.bt, na.rm=T) - min(cM.bt, na.rm=T)) / (window.size / 1000000),
            ifelse(
                is.na(cM.bt),
                NA,
                cM.bt)
        )
        cM.rs    <-    m.rs$cM[m.rs$bp >= j & m.rs$bp <= end]
        cMperMb.rs    <- ifelse(
            length(cM.rs) > 1, 
            (max(cM.rs, na.rm=T) - min(cM.rs, na.rm=T)) / (window.size / 1000000),
            ifelse(
                is.na(cM.rs),
                NA,
                cM.rs)
        )      
        cM.h    <-    m.h$cM[m.h$bp >= j & m.h$bp <= end]
        cMperMb.h    <- ifelse(
            length(cM.h) > 1, 
            (max(cM.h, na.rm=T) - min(cM.h, na.rm=T)) / (window.size / 1000000),
            ifelse(
                is.na(cM.h),
                NA,
                cM.h)
        )
        place2b    <-    p$bp >= j & p$bp <= end
        pi         <-    mean(p$pi[place2b])
        pi.bt      <-    mean(p$pi.bt[place2b])
        pi.rs      <-    mean(p$pi.rs[place2b])
        dxy        <-    mean(p$dxy.rsbt[place2b])
        fst        <-    mean(p$fst.rsbt[place2b])
        tmrca      <-    mean(p$threespine.scaled[place2b])
        t.noD      <-    mean(p$threespine.scaled[place2b & p$cons.sort != 'D'])
        d.dens     <-    length(p$cons.sort[p$cons.sort == 'D' & place2b]) / length(p$cons.sort[place2b])
        result     <-    c(i, j, end, bp.mid, cMperMb.bt, cMperMb.rs, cMperMb.h,
                          pi, pi.bt, pi.rs, dxy, fst, tmrca, t.noD, d.dens)
        windowed    <-    rbind(windowed, result)
    }
    
}
rownames(windowed)    <-    NULL
windowed    <-    data.frame(windowed)
names(windowed)    <-    c("chr","bp.start","bp.end","bp.mid",
                    "cMperMb.bt","cMperMb.rs","cMperMb.h",
                    "pi","pi.bt","pi.rs","dxy","fst", "tmrca", "t.noD","d.dens")

windowed$d.dens.scaled	<- scale.vals(windowed$d.dens, 0,1)
point.col               <- rgb(0.5,0.5,0.5,0.5)
inv.col                 <- rgb(0.95,0.25,0.25,0.75)
windowed$inv.col        <- rep(point.col, length(windowed$bp.mid))
windowed$inv.col        <- ifelse(windowed$chr == 21 & 
                                  windowed$bp.start >= 9934148 &
                                  windowed$bp.end <= 11624150, inv.col, point.col)

plot((windowed$bp.mid[windowed$chr == 21])/1000000, windowed$dxy[windowed$chr == 21])
	abline(v = 9.934148) ; abline(v = 11.62415)

# GET AVERAGES FOR INV21

bt  <- maps[maps$map == "Bt_Subset" & 
           maps$chr == 21 & maps$bp > 9934148 & maps$bp < 11624150,]
rs  <- maps[maps$map == "RS" & 
           maps$chr == 21 & maps$bp > 9934148 & maps$bp < 11624150,]
hyb <- maps[maps$map == "Hybrid_Subset" & 
           maps$chr == 21 & maps$bp > 9934148 & maps$bp < 11624150,]

bt.rate  <- (range(bt$cM)[2] - range(bt$cM)[1]) / (range(bt$Mb)[2] - range(bt$Mb)[1])
rs.rate  <- (range(rs$cM)[2] - range(rs$cM)[1]) / (range(rs$Mb)[2] - range(rs$Mb)[1])
hyb.rate <- (range(hyb$cM)[2] - range(hyb$cM)[1]) / (range(hyb$Mb)[2] - range(hyb$Mb)[1])
fst      <- mean(popgen$fst.rsbt[
                     popgen$chr == 21 & popgen$bp > 9934148 & popgen$bp < 11624150])
dxy      <- mean(popgen$dxy.rsbt[
                     popgen$chr == 21 & popgen$bp > 9934148 & popgen$bp < 11624150])
tmrca    <- mean(popgen$threespine.scaled[
                     popgen$chr == 21 & popgen$bp > 9934148 & popgen$bp < 11624150])
inv.means <- data.frame(bt.rate, rs.rate, hyb.rate, fst, dxy, tmrca)

###~~~~~FST~~~~~###

par(mfrow = c(1,3))
plot(windowed$cMperMb.bt, windowed$fst, xlim = c(0,25), ylim = c(0,1), 
          pch = 20, col = windowed$inv.col, main = "BT",
          xlab = paste0("cM per Mb in ",window.size/1000," kb windows"), ylab= "FST")
    points(inv.means$bt.rate, inv.means$fst, pch = 20, col = inv.col)
    print(c    <-    cor.test(windowed$cMperMb.bt, windowed$fst, method="spearman"))
plot(windowed$cMperMb.rs, windowed$fst, xlim = c(0,25), ylim = c(0,1), 
          pch = 20, col = windowed$inv.col, main = "RS",
          xlab = paste0("cM per Mb in ",window.size/1000," kb windows"), ylab= "FST")
    points(inv.means$rs.rate, inv.means$fst, pch = 20, col = inv.col)
    cor.test(windowed$cMperMb.rs, windowed$fst, method="spearman")
plot(windowed$cMperMb.h, windowed$fst, xlim = c(0,25), ylim = c(0,1), 
          pch = 20, col = windowed$inv.col, main = "Hybrid",
          xlab = paste0("cM per Mb in ",window.size/1000," kb windows"), ylab= "FST")
    points(inv.means$hyb.rate, inv.means$fst, pch = 20, col = inv.col)
    cor.test(windowed$cMperMb.h, windowed$fst, method="spearman")

###~~~~~DXY~~~~~###

plot(windowed$cMperMb.bt, windowed$dxy, xlim = c(0,25), 
     pch = 20, col = rgb(windowed$d.dens.scaled,0,0,.5))
    cor.test(windowed$cMperMb.bt, windowed$dxy, method="spearman")
plot(windowed$cMperMb.rs, windowed$dxy, xlim = c(0,25), 
    pch = 20, col = rgb(windowed$d.dens.scaled,0,0,.5))
    cor.test(windowed$cMperMb.rs, windowed$dxy, method="spearman")
plot(windowed$cMperMb.h, windowed$dxy, xlim = c(0,25), 
     pch = 20, col = rgb(windowed$d.dens.scaled,0,0,.5), main = "Hybrid",
     xlab = paste0("cM per Mb in ",window.size/1000," kb windows"), ylab= "dXY")
    cor.test(windowed$cMperMb.h, windowed$dxy, method="spearman")

###~~~~~PI~~~~~###

plot(windowed$cMperMb.bt, windowed$pi, xlim = c(0,25), 
    pch = 20, col = rgb(windowed$d.dens.scaled,0,0,.5))
    cor.test(windowed$cMperMb.bt, windowed$pi, method="spearman")
plot(windowed$cMperMb.rs, windowed$pi, xlim = c(0,25), 
    pch = 20, col = rgb(windowed$d.dens.scaled,0,0,.5))
    cor.test(windowed$cMperMb.rs, windowed$pi, method="spearman")
plot(windowed$cMperMb.h, windowed$pi, xlim = c(0,25), 
    pch = 20, col = rgb(windowed$d.dens.scaled,0,0,.5))
    cor.test(windowed$cMperMb.h, windowed$pi, method="spearman")

###~~~~~PI(Boot)~~~~~###

plot(windowed$cMperMb.bt, windowed$pi.bt, pch = 20, col = rgb(windowed$d.dens.scaled,0,0,.5), main = "Boot",
          xlab = paste0("cM per Mb in ",window.size/1000," kb windows"), ylab= "pi, BT")
    cor.test(windowed$cMperMb.bt, windowed$pi.bt, method="spearman")
plot(windowed$cMperMb.rs, windowed$pi.bt, pch = 20, col = rgb(windowed$d.dens.scaled,0,0,.5))
    cor.test(windowed$cMperMb.rs, windowed$pi.bt, method="spearman")
plot(windowed$cMperMb.h, windowed$pi.bt, pch = 20, col = rgb(windowed$d.dens.scaled,0,0,.5), main = "Hybrid",
          xlab = paste0("cM per Mb in ",window.size/1000," kb windows"), ylab= "pi, BT")
    cor.test(windowed$cMperMb.h, windowed$pi.bt, method="spearman")

###~~~~~PI(Rabbit)~~~~~###

plot(windowed$cMperMb.bt, windowed$pi.rs, pch = 20, col = rgb(windowed$d.dens.scaled,0,0,.5))
    cor.test(windowed$cMperMb.bt, windowed$pi.rs, method="spearman")
plot(windowed$cMperMb.rs, windowed$pi.rs, pch = 20, col = rgb(windowed$d.dens.scaled,0,0,.5))
    cor.test(windowed$cMperMb.rs, windowed$pi.rs, method="spearman")
plot(windowed$cMperMb.h, windowed$pi.rs, pch = 20, col = rgb(windowed$d.dens.scaled,0,0,.5))
    cor.test(windowed$cMperMb.h, windowed$pi.rs, method="spearman")

###~~~~~TMRCA~~~~~###

plot(windowed$cMperMb.bt, windowed$tmrca, xlim = c(0,25), 
    pch = 20, col = rgb(windowed$d.dens.scaled,0,0,.5))
    cor.test(windowed$cMperMb.bt, windowed$tmrca, method="spearman")
plot(windowed$cMperMb.rs, windowed$tmrca, xlim = c(0,25), 
    pch = 20, col = rgb(windowed$d.dens.scaled,0,0,.5))
    cor.test(windowed$cMperMb.rs, windowed$tmrca, method="spearman")
plot(windowed$cMperMb.h, windowed$tmrca, xlim = c(0,25), 
     pch = 20, col = rgb(windowed$d.dens.scaled,0,0,.5), main = "Hybrid",
     xlab = paste0("cM per Mb in ",window.size/1000," kb windows"), ylab= "tmrca")
    cor.test(windowed$cMperMb.h, windowed$tmrca, method="spearman")

###~~~~~TMRCA(NO D)~~~~~###

plot(windowed$cMperMb.bt, windowed$t.noD, pch = 20, col = rgb(windowed$d.dens.scaled,0,0,.5))
    cor.test(windowed$cMperMb.bt, windowed$t.noD, method="spearman")
plot(windowed$cMperMb.rs, windowed$t.noD, pch = 20, col = rgb(windowed$d.dens.scaled,0,0,.5))
    cor.test(windowed$cMperMb.rs, windowed$t.noD, method="spearman")
plot(windowed$cMperMb.h, windowed$t.noD, pch = 20, col = rgb(windowed$d.dens.scaled,0,0,.5), main = "Hybrid",
          xlab = paste0("cM per Mb in ",window.size/1000," kb windows"), ylab= "tmrca, no D")
    cor.test(windowed$cMperMb.h, windowed$t.noD, method="spearman")


### HYBRID 4-PANEL FIGURE

par(mfrow = c(2,2), mar = c(4,3,1,1)+0.1)
plot(windowed$cMperMb.h, windowed$pi.bt, pch = 20, col = rgb(0,0,0,.25),
    ylim = c(0,0.012))
    # cor.test(windowed$cMperMb.h, windowed$fst, method="spearman")
plot(windowed$cMperMb.h, windowed$pi.rs, pch = 20, col = rgb(0,0,0,.25),
    ylim = c(0,0.012))
    # cor.test(windowed$cMperMb.h, windowed$fst, method="spearman")
plot(windowed$cMperMb.h, windowed$fst, pch = 20, col = rgb(0,0,0,.25))
    # cor.test(windowed$cMperMb.h, windowed$fst, method="spearman")
plot(windowed$cMperMb.h, windowed$dxy, pch = 20, col = rgb(0,0,0,.25))
    # cor.test(windowed$cMperMb.h, windowed$fst, method="spearman")


### GENOME-SCAN CORRELATIONS


pop.smoov        <-    NULL
pop.bw            <-    0.5
rec.bt.smoov    <-    NULL
rec.rs.smoov    <-    NULL
rec.hy.smoov    <-    NULL
rec.bw            <-    0.5


for (i in 1:21) {
#    i = 1
    d = popgen[as.numeric(popgen$chr) == i,]
    dxy.smoov    <-    ksmooth(d$Mb, d$dxy.rsbt,        bandwidth = pop.bw, kernel = 'normal')
    fst.smoov    <-    ksmooth(d$Mb, d$fst.rsbt,    bandwidth = pop.bw, kernel = 'normal')
    pix.smoov    <-    ksmooth(d$Mb, d$pi.bt,        bandwidth = pop.bw, kernel = 'normal')
    piy.smoov    <-    ksmooth(d$Mb, d$pi.rs,        bandwidth = pop.bw, kernel = 'normal')
    Mb = dxy.smoov$x
    chr = rep(i, length(Mb))
    pix = pix.smoov$y
    piy = piy.smoov$y
    dxy = dxy.smoov$y
    fst = fst.smoov$y
    x = data.frame(chr,Mb,pix,piy,dxy,fst)
    pop.smoov    <-    rbind(pop.smoov,x)

#i = 1
    
    d = maps[as.numeric(maps$chr) == i,]
    bt = d[d$map == "Bt_Subset",]
    rs = d[d$map == "RS",]
    hy  = d[d$map == "Hybrid_Subset",]
    
    sm    <-    ksmooth(bt$Mb, bt$cMperMb, 
                        bandwidth = rec.bw, kernel = 'normal')
        chr = rep(i, length(sm$x))
        Mb    = sm$x
        cMperMb = sm$y
        sm    <-    data.frame(chr,Mb,cMperMb)
        rec.bt.smoov    <-rbind(rec.bt.smoov,sm)
    
    sm    <-    ksmooth(rs$Mb, rs$cMperMb, 
                        bandwidth = rec.bw, kernel = 'normal')
        chr = rep(i, length(sm$x))
        Mb    = sm$x
        cMperMb = sm$y
        sm    <-    data.frame(chr,Mb,cMperMb)
        rec.rs.smoov    <-rbind(rec.rs.smoov,sm)

    sm    <-    ksmooth(hy$Mb, hy$cMperMb, 
                        bandwidth = rec.bw, kernel = 'normal')
        chr = rep(i, length(sm$x))
        Mb    = sm$x
        cMperMb = sm$y
        sm    <-    data.frame(chr,Mb,cMperMb)
        rec.hy.smoov    <-rbind(rec.hy.smoov,sm)
}


i = 7
div        <-    pop.smoov[pop.smoov$chr == i,]
rec.bt    <-    rec.bt.smoov[rec.bt.smoov$chr == i,]
rec.rs    <-    rec.rs.smoov[rec.rs.smoov$chr == i,]
rec.hy    <-    rec.hy.smoov[rec.hy.smoov$chr == i,]

# CORR W/ FST

xlim = c(0,max(div$Mb))
# xlim = c(25,27)
par(mar = c(5,4,2,4)+0.1)
plot(0,0, col = 'white', ylim = c(0,1), xlim = xlim,
        yaxt = 'n', xlab = paste0("chromosome ",as.character(i),', Mb'), ylab = "haplotype FST")
    axis(2)
    lines(div$Mb, div$fst, col = 'black', lwd = 2)

    par(new=TRUE)
    plot(rec.hy$Mb, rec.hy$cMperMb, type = 'l', xaxt='n',yaxt='n', xlim = xlim, ylab = '', xlab = '', lwd = 1, col = 'purple')
        axis(4)
        mtext("cM per Mb", side = 4, line = 3)
        # lines(rec.rs$Mb, rec.rs$cMperMb, col = 'red3')
        # lines(rec.bt$Mb, rec.bt$cMperMb, col = 'blue3')
    legend(x = 'topleft', cex = 0.75,
        legend = c("FST","cM per Mb, hybrid"), 
        lty = c('solid','solid'), 
        col = c("black","purple"),
        lwd = c(2,1))
    # abline(v = seq(0,30), lty = 'dotted')

# CORR: RS recrate vs RS PI

xlim = c(0,max(div$Mb))
# xlim = c(25,27)
par(mar = c(5,4,2,4)+0.1)
plot(0,0, col = 'white', ylim = c(0,0.015), xlim = xlim,
        yaxt = 'n', xlab = paste0("chromosome ",as.character(i),', Mb'), ylab = "pi (RS)")
    axis(2)
    lines(div$Mb, div$piy, col = 'black', lwd = 2)

    par(new=TRUE)
    plot(rec.rs$Mb, rec.rs$cMperMb, type = 'l', xaxt='n',yaxt='n', xlim = xlim, ylab = '', xlab = '', lwd = 1, col = 'red3')
        axis(4)
        mtext("cM per Mb", side = 4, line = 3)
        # lines(rec.rs$Mb, rec.rs$cMperMb, col = 'red3')
        # lines(rec.bt$Mb, rec.bt$cMperMb, col = 'blue3')
    legend(x = 'topleft', cex = 0.75,
        legend = c("pi(RS)","cM per Mb, RS"), 
        lty = c('solid','solid'), 
        col = c("black","red3"),
        lwd = c(2,1))
    # abline(v = seq(0,30), lty = 'dotted')


# CORR: BT recrate vs BT PI

xlim = c(0,max(div$Mb))
# xlim = c(25,27)
par(mar = c(5,4,2,4)+0.1)
plot(0,0, col = 'white', ylim = c(0,0.015), xlim = xlim,
        yaxt = 'n', xlab = paste0("chromosome ",as.character(i),', Mb'), ylab = "pi (BT)")
    axis(2)
    lines(div$Mb, div$pix, col = 'black', lwd = 2)

    par(new=TRUE)
    plot(rec.bt$Mb, rec.bt$cMperMb, type = 'l', xaxt='n',yaxt='n', xlim = xlim, ylab = '', xlab = '', lwd = 1, col = 'blue3')
        axis(4)
        mtext("cM per Mb", side = 4, line = 3)
        # lines(rec.rs$Mb, rec.rs$cMperMb, col = 'red3')
        # lines(rec.bt$Mb, rec.bt$cMperMb, col = 'blue3')
    legend(x = 'topleft', cex = 0.75,
        legend = c("pi(BT)","cM per Mb, BT"), 
        lty = c('solid','solid'), 
        col = c("black","red3"),
        lwd = c(2,1))
    # abline(v = seq(0,30), lty = 'dotted')


###~~~~~~~~~~~~~~~~~~~~~~~~~~~~~~~~~~~~~~~~~###
### SMOOTH PHYSICAL AND GENETIC MAPS SO THAT 
### INTERVALS ARE THE SAME FOR ALL.
### 
### PERFORM RANDOMIZATIONS TO ASSIGN 
### SIGNIFICANCE TO ALL INTERVALS
###~~~~~~~~~~~~~~~~~~~~~~~~~~~~~~~~~~~~~~~~~###

bw			<-	0.25
permutes	<-	10000
confidence	<-	0.999
LGs.info	<-	read.table("~/Dropbox/Data/active/GacNewLGs.tsv", sep = "\t", 
							header = TRUE, stringsAsFactors = FALSE)
	group	<-	2	# ***column in which to find 'group' label (You specify)
	bp		<-	3	# ***column in which to find chromosome-specific bp position (You specify)
	cat("Using genome assembly from Glazer et al.\n")

map.smoov	<-	NULL

for (i in 1:21)	{
	# i = 2
	cat(paste0("Flipping through chromosome ",i,"\n"))
	map.bt	<-	maps[maps$map == "Bt",]
	map.rs	<-	maps[maps$map == "RS",]
	map.h	<-	maps[maps$map == "Hybrid",]
	map.bt	<-	map.bt[map.bt$chr == i,]
	map.rs	<-	map.rs[map.rs$chr == i,]
	map.h	<-	map.h [map.h$chr  == i,]
	p	<-	popgen[popgen$chr == i,]
	# Get chr length from LGs.info
	len	<-	LGs.info$LGs.len[LGs.info$groups == i]
	range.x	<-	c(0,len / 1000000) # set range for ksmooth

	# CONVERT TO GENOMIC COORDS BY STORING THE RUNNING SUM FOR ALL PREV GROUPS
	if (i == 1) {
		# initialize variables
		g.sum  <- 0
		bt.sum <- 0
		rs.sum <- 0
		h.sum  <- 0
	} else {
		g.sum  <- g.sum + (LGs.info$LGs.len[LGs.info$groups == (i-1)] / 1000000)
		bt.sum <- bt.sum + max(maps$cM[maps$map == "Bt" & maps$chr == (i-1)])
		rs.sum <- rs.sum + max(maps$cM[maps$map == "RS" & maps$chr == (i-1)])
		h.sum  <- h.sum + max(maps$cM[maps$map == "Hybrid" & maps$chr == (i-1)])
	}

	# map will have fewer data points, so use that as n.points
	n.points	<-	min(dim(map.bt)[1],dim(map.rs)[1],dim(map.h)[1],na.rm=TRUE)
	cm.bt.sm		<-	ksmooth(map.bt$Mb, map.bt$cM, 
						kernel = 'normal', bandwidth = bw,
						range.x = range.x, n.points = n.points)	
	cm.rs.sm		<-	ksmooth(map.rs$Mb, map.rs$cM, 
						kernel = 'normal', bandwidth = bw,
						range.x = range.x, n.points = n.points)	
	cm.h.sm		<-	ksmooth(map.h$Mb, map.h$cM, 
						kernel = 'normal', bandwidth = bw,
						range.x = range.x, n.points = n.points)

	fst.sm		<-	ksmooth(p$Mb, p$fst.rsbt, kernel = 'normal', bandwidth = bw,
						range.x = range.x, n.points = n.points)
	pi.sm		<-	ksmooth(p$Mb, p$pi, kernel = 'normal', bandwidth = bw,
						range.x = range.x, n.points = n.points)
	pi.bt.sm		<-	ksmooth(p$Mb, p$pi.bt, kernel = 'normal', bandwidth = bw,
						range.x = range.x, n.points = n.points)
	pi.rs.sm		<-	ksmooth(p$Mb, p$pi.rs, kernel = 'normal', bandwidth = bw,
						range.x = range.x, n.points = n.points)
	dxy.sm		<-	ksmooth(p$Mb, p$dxy, kernel = 'normal', bandwidth = bw,
						range.x = range.x, n.points = n.points)
	tmrca.sm	<-	ksmooth(p$Mb, p$threespine.scaled, kernel = 'normal', bandwidth = bw,
						range.x = range.x, n.points = n.points)

	cat(paste0("\tFST\n"))
	fst.outlier	<-	outliers(xvals = p$Mb, yvals = p$fst.rsbt, ypool = popgen$fst.rsbt,
						conf = confidence, perms = permutes, bw = bw, n.points = n.points,
						range.x = range.x)
	cat(paste0("\tdXY\n"))
	dxy.outlier	<-	outliers(xvals = p$Mb, yvals = p$dxy, ypool = popgen$dxy,
						conf = confidence, perms = permutes, bw = bw, n.points = n.points,
						range.x = range.x)
	cat(paste0("\tTMRCA\n"))
	tmrca.outlier	<-	outliers(xvals = p$Mb, yvals = p$threespine.scaled, ypool = popgen$threespine.scaled,
						conf = confidence, perms = permutes, bw = bw, n.points = n.points,
						range.x = range.x)

	# PERMUTE PI.SM VALUES 'PERMUTES' TIMES


	Mb		<-	cm.bt.sm$x
	chr		<-	rep(i, length(Mb))
	cM.bt	<-	cm.bt.sm$y
	cM.rs	<-	cm.rs.sm$y
	cM.h	<-	cm.h.sm$y
	Mb.genomic <- Mb + g.sum
	bt.genomic <- cM.bt + bt.sum
	rs.genomic <- cM.rs + rs.sum
	h.genomic  <- cM.h  + h.sum
	fst		<-	fst.sm$y
	fst.lower	<-	fst.outlier$lower
	fst.upper	<-	fst.outlier$upper
	fst.outlier	<-	fst.outlier$outlier
	dxy		<-	dxy.sm$y
	dxy.lower	<-	dxy.outlier$lower
	dxy.upper	<-	dxy.outlier$upper
	dxy.outlier	<-	dxy.outlier$outlier
	tmrca		<-	tmrca.sm$y
	tmrca.lower	<-	tmrca.outlier$lower
	tmrca.upper	<-	tmrca.outlier$upper
	tmrca.outlier	<-	tmrca.outlier$outlier
	pi		<-	pi.sm$y
	pi.bt	<-	pi.bt.sm$y
	pi.rs	<-	pi.rs.sm$y
	
	sm	<-	data.frame(chr,Mb,cM.bt,cM.rs,cM.h,Mb.genomic,bt.genomic,rs.genomic,h.genomic,fst, fst.lower, fst.upper, fst.outlier, dxy, dxy.lower, dxy.upper, dxy.outlier, tmrca, tmrca.lower, tmrca.upper, tmrca.outlier, pi, pi.bt, pi.rs)
	map.smoov	<-	rbind(map.smoov,sm)
}

# map.smoov$fst.grays	<-	1- scale.vals(map.smoov$fst, 0.3,1.0)
# map.smoov$fst.grays	<-	hsv(0,0, map.smoov$fst.grays)

write.table(map.smoov, file = paste0(baseDIR,"4.data/1.datasets/maps_smoothed_full_with99point9percCIs.tsv"), sep = "\t", quote = F, row.names=F)


chr = 21

fst.hi <- map.smoov[map.smoov$fst.outlier == 1 & map.smoov$chr == chr,]
dxy.hi <- map.smoov[map.smoov$dxy.outlier == 1 & map.smoov$chr == chr,]
tmrca.hi <- map.smoov[map.smoov$tmrca.outlier == 1 & map.smoov$chr == chr,]

plot(0,0, type = 'n', xlim = range(map.smoov$Mb[map.smoov$chr==chr]), ylim = c(0,3))
	segments(x0 = fst.hi$Mb, x1 = fst.hi$Mb,
             y0 = 0.1, 0.9)
	segments(x0 = dxy.hi$Mb, x1 = dxy.hi$Mb,
             y0 = 1.1, 1.9)
	segments(x0 = tmrca.hi$Mb, x1 = tmrca.hi$Mb,
             y0 = 2.1, 2.9)


###~~~~~~~~~~~~~~~~~~~~~~~~~~~~~~~~~~~~~~~~~###
### CREATE DISTRIBUTIONS OF PERCENT OF MAP 
##  WHERE FST ≥ x
###~~~~~~~~~~~~~~~~~~~~~~~~~~~~~~~~~~~~~~~~~###

map.smoov	<-	read.table(paste0(baseDIR,"4.data/1.datasets/maps_smoothed_full_with99point9percCIs.tsv"), 
                sep = '\t', header = T)


stat <- map.smoov$fst
cutoffs	<-	seq(0,1,by=0.01)

stat <- map.smoov$tmrca
cutoffs	<-	seq(0,15,by=0.1)

stat <- map.smoov$dxy
cutoffs	<-	seq(0,0.02,by=0.0001)

stat <- map.smoov$pi.rs
cutoffs	<-	seq(0,0.02,by=0.0001)


gt.percent	<-	matrix(nrow = length(cutoffs), ncol = 5)

for (c in 1:length(cutoffs))	{
	
	map.smoov$gt	<-	0
	map.smoov$gt[stat >= cutoffs[c]] <- 1
	
	gt.Mb	<-	NULL
	gt.bt	<-	NULL
	gt.rs	<-	NULL
	gt.h	<-	NULL
	
	for (i in 1:21) {
		#i = 2
		ms		<-	map.smoov[map.smoov$chr == i,]
		ints.Mb		<-	intervals(vals = ms$Mb, conditions = ms$gt)
			chr		<-	rep(i, dim(ints.Mb)[1])
			ints.Mb$chr	<-	chr
		ints.cM.bt	<-	intervals(vals = ms$cM.bt, conditions = ms$gt)
			chr		<-	rep(i, dim(ints.cM.bt)[1])
			ints.cM.bt$chr	<-	chr
		ints.cM.rs	<-	intervals(vals = ms$cM.rs, conditions = ms$gt)
			chr		<-	rep(i, dim(ints.cM.rs)[1])
			ints.cM.rs$chr	<-	chr
		ints.cM.h	<-	intervals(vals = ms$cM.h, conditions = ms$gt)
			chr		<-	rep(i, dim(ints.cM.h)[1])
			ints.cM.h$chr	<-	chr
		
		gt.Mb	<-	rbind(gt.Mb, ints.Mb)
		gt.bt	<-	rbind(gt.bt, ints.cM.bt)
		gt.rs	<-	rbind(gt.rs, ints.cM.rs)
		gt.h	<-	rbind(gt.h, ints.cM.h)
	}
	
	len.mapped.Mb	<-	sum(gt.Mb$len, na.rm = TRUE)
#	gt.Mb$genomic.start	<-	make_genomic(gt.Mb$start*1000000,gt.Mb$chr) / 1000000
	len.fst.hi.Mb	<-	sum(gt.Mb$len[gt.Mb$signif == 'hi'], na.rm = TRUE)
	Mb.high			<-	gt.Mb[gt.Mb$signif == 'hi',]
	per.fst.hi.Mb	<-	len.fst.hi.Mb / len.mapped.Mb
	
	len.mapped.cM.bt	<-	sum(gt.bt$len, na.rm = TRUE)
	len.fst.hi.cM.bt	<-	sum(gt.bt$len[gt.bt$signif == 'hi'], na.rm = TRUE)
	per.fst.hi.cM.bt	<-	len.fst.hi.cM.bt / len.mapped.cM.bt
	
	len.mapped.cM.rs	<-	sum(gt.rs$len, na.rm = TRUE)
	len.fst.hi.cM.rs	<-	sum(gt.rs$len[gt.rs$signif == 'hi'], na.rm = TRUE)
	per.fst.hi.cM.rs	<-	len.fst.hi.cM.rs / len.mapped.cM.rs
	
	len.mapped.cM.h	<-	sum(gt.h$len, na.rm = TRUE)
	len.fst.hi.cM.h	<-	sum(gt.h$len[gt.h$signif == 'hi'], na.rm = TRUE)
	per.fst.hi.cM.h	<-	len.fst.hi.cM.h / len.mapped.cM.h
	
	result	<-	c(cutoffs[c],per.fst.hi.Mb,per.fst.hi.cM.bt,per.fst.hi.cM.rs,per.fst.hi.cM.h)
	gt.percent[c,]	<-	result
}

gt.percent	<-	data.frame(gt.percent)
names(gt.percent)	<-	c("stat.cutoff","phys","BT","RS","Hybrid")

xlim <- c(3,10)
xlim <- range(cutoffs)

plot(gt.percent$stat.cutoff, gt.percent$phys,type='l',lwd = 2, xlim = xlim,
		xlab = 'Smoothed stat cutoff', ylab = "percent of map ≥ cutoff")
	lines(gt.percent$stat.cutoff, gt.percent$BT, col = 'blue3')
	lines(gt.percent$stat.cutoff, gt.percent$RS, col = 'red3')
	lines(gt.percent$stat.cutoff, gt.percent$Hybrid, col = 'purple3', lwd = 2)

gt.percent$BT.diff	<-	gt.percent$phys - gt.percent$BT
gt.percent$RS.diff	<-	gt.percent$phys - gt.percent$RS
gt.percent$Hybrid.diff	<-	gt.percent$phys - gt.percent$Hybrid

gt.percent$BT.percPhys	<-	gt.percent$BT / gt.percent$phys
gt.percent$RS.percPhys	<-	gt.percent$RS / gt.percent$phys
gt.percent$Hybrid.percPhys	<-	gt.percent$Hybrid / gt.percent$phys


par(new = TRUE)
plot(gt.percent$stat.cutoff, gt.percent$BT.diff, type = 'l', xlim = c(0,0.6), col = 'blue3')
	lines(gt.percent$stat.cutoff, gt.percent$RS.diff, col = 'red3')
	lines(gt.percent$stat.cutoff, gt.percent$Hybrid.diff, col = 'purple3')

plot(gt.percent$stat.cutoff, gt.percent$BT.percPhys, type = 'l', xlim = c(0,0.6), col = 'blue3')
	lines(gt.percent$stat.cutoff, gt.percent$RS.percPhys, col = 'red3')
	lines(gt.percent$stat.cutoff, gt.percent$Hybrid.percPhys, col = 'purple3')


###~~~~~~~~~~~~~~~~~~~~~~~~~~~~~~~~~~~~~~~~~~~~~~~~~~~~~~~~~~~~~~~~~~~~~~~~~~~~~###
###~~~~~~~~~~~~~~~~~~~~~~~~~~~~~~~~~~~~~~~~~~~~~~~~~~~~~~~~~~~~~~~~~~~~~~~~~~~~~###
###~~~~~~~~~~~~~~~~~~~~~~~~~~~~~~~~~~~~~~~~~~~~~~~~~~~~~~~~~~~~~~~~~~~~~~~~~~~~~###
###~~~~~~~~~~~~~~~~~~~~~~~~~~~~~~~~~~~~GENETIC~~~~~~~~~~~~~~~~~~~~~~~~~~~~~~~~~~###
###~~~~~~~~~~~~~~~~~~~~~~~~~~~~~~~~~~~~~~MAP~~~~~~~~~~~~~~~~~~~~~~~~~~~~~~~~~~~~###
###~~~~~~~~~~~~~~~~~~~~~~~~~~~~~~~~~~~~~SCANS~~~~~~~~~~~~~~~~~~~~~~~~~~~~~~~~~~~###
###~~~~~~~~~~~~~~~~~~~~~~~~~~~~~~~~~~~~~~~~~~~~~~~~~~~~~~~~~~~~~~~~~~~~~~~~~~~~~###
###~~~~~~~~~~~~~~~~~~~~~~~~~~~~~~~~~~~~~~~~~~~~~~~~~~~~~~~~~~~~~~~~~~~~~~~~~~~~~###
###~~~~~~~~~~~~~~~~~~~~~~~~~~~~~~~~~~~~~~~~~~~~~~~~~~~~~~~~~~~~~~~~~~~~~~~~~~~~~###


###~~~~~~~~~~~~~~~~~~~~~~~~~~~~~~~~~~~~~~~~~~~~~~~~~~~###
###                                                   ###
###              FST GENETIC MAP SCANS                ###
###                                                   ###
###~~~~~~~~~~~~~~~~~~~~~~~~~~~~~~~~~~~~~~~~~~~~~~~~~~~###

library(RColorBrewer)
library(wesanderson)
map.smoov	<-	read.table(paste0(baseDIR,"4.data/1.datasets/maps_smoothed_full_with99point9percCIs.tsv"), 
                sep = '\t', header = T)

map.smoov$fst.grays	<-	1- scale.vals(map.smoov$fst, 0.3,1.0)
map.smoov$fst.grays	<-	hsv(0,0, map.smoov$fst.grays)

plot.map.fst	<-	function(chr = "genomic", low.col = "lightblue", mid.col = "orange", hi.col = "red3") {
	# chr = "21"; low.col = "lightblue"; mid.col = "orange"; hi.col = "red3"
	chr	<-	chr
	if (is.numeric(chr)) {
		ms	<-	map.smoov[map.smoov$chr == chr,]
		Mb.max		<-	max(map.smoov$Mb, na.rm = TRUE)
		cM.max.bt	<-	max(map.smoov$cM.bt, na.rm = TRUE)
		cM.max.rs	<-	max(map.smoov$cM.rs, na.rm = TRUE)
		cM.max.h	<-	max(map.smoov$cM.h, na.rm = TRUE)
		cM.max		<-	max(cM.max.bt,cM.max.rs,cM.max.h)
	} else {
		ms <- map.smoov
		ms$Mb <- ms$Mb.genomic
		ms$cM.bt <- ms$bt.genomic
		ms$cM.rs <- ms$rs.genomic
		ms$cM.h  <- ms$h.genomic
		Mb.max		<-	max(ms$Mb, na.rm = TRUE)
		cM.max.bt	<-	max(ms$cM.bt, na.rm = TRUE)
		cM.max.rs	<-	max(ms$cM.rs, na.rm = TRUE)
		cM.max.h	<-	max(ms$cM.h, na.rm = TRUE)
		cM.max		<-	max(cM.max.bt,cM.max.rs,cM.max.h)
	}
	ms	<-	ms[order(ms$fst),]
	colfx <- colorRampPalette(c(low.col,mid.col,hi.col),interpolate="linear")	
	cols	<-	colfx(7)	
	ms$col	<-	rep(			cols[7], dim(ms)[1])
		ms$col[ms$fst < 0.7] <-	cols[6]
		ms$col[ms$fst < 0.6] <-	cols[5]
		ms$col[ms$fst < 0.5] <-	cols[4]
		ms$col[ms$fst < 0.4] <-	cols[3]
		ms$col[ms$fst < 0.3] <-	cols[2]
		ms$col[ms$fst < 0.2] <-	cols[1]
	Mb.axis		<-	3.00 # y position to start Mb axis
	cm.bt.top	<-	2.50 # y position to be top (bottom) of cM-based Fst scan
	cm.rs.top	<-	2.00 # y position to be top (bottom) of cM-based Fst scan
	cm.h.top	<-	1.50 # y position to be top (bottom) of cM-based Fst scan
	mapwidth	<-	0.05 ; mapoffset	<-	mapwidth / 2
	ms$fst.Mb	<-	ms$fst + Mb.axis
	ms$fst.cM	<-	cm.h.top - ms$fst
	xmax		<-	Mb.max
	Mb.med		<-	(max(ms$Mb, na.rm=T) - min(ms$Mb, na.rm=T)) / 2
	cM.bt.med	<-	(max(ms$cM.bt, na.rm=T) - min(ms$cM.bt, na.rm=T)) / 2
	cM.rs.med	<-	(max(ms$cM.rs, na.rm=T) - min(ms$cM.rs, na.rm=T)) / 2
	cM.h.med	<-	(max(ms$cM.h, na.rm=T) - min(ms$cM.h, na.rm=T)) / 2

	# SCALE MB SO THAT MAX(CHR MB) == MAX(LG cM)
	Mb.med.glob	<-	Mb.max / 2
	Mb.med.diff	<-	Mb.med.glob - Mb.med
	ms$Mb.scale	<-	ms$Mb + Mb.med.diff
	# SCALE BOOT CROSS CENTIMORGANS TO TOTAL MAP LENGTH
	cM.bt.med.glob	<-	cM.max.bt / 2
	cM.bt.med.diff	<-	cM.bt.med.glob - cM.bt.med
	ms$cM.bt.scale	<-	(ms$cM.bt + cM.bt.med.diff) * (xmax/cM.max.bt)
	bt.scale.bar.len<-	10 * (xmax/cM.max.bt)
	# SCALE RABBIT CROSS CENTIMORGANS TO TOTAL MAP LENGTH
	cM.rs.med.glob	<-	cM.max.rs / 2
	cM.rs.med.diff	<-	cM.rs.med.glob - cM.rs.med
	ms$cM.rs.scale	<-	(ms$cM.rs + cM.rs.med.diff) * (xmax/cM.max.rs)
	rs.scale.bar.len<-	10 * (xmax/cM.max.rs)
	# SCALE HYBRID CROSS CENTIMORGANS TO TOTAL MAP LENGTH	
	cM.h.med.glob	<-	cM.max.h / 2
	cM.h.med.diff	<-	cM.h.med.glob - cM.h.med
	ms$cM.h.scale	<-	(ms$cM.h + cM.h.med.diff) * (xmax/cM.max.h)
	h.scale.bar.len	<-	10 * (xmax/cM.max.h)
	cols	<-	ms$col
	plot(0,0, xlim = c(0,xmax), ylim = c(0,Mb.axis+1), xlab = '', ylab = '',
		xaxt = 'n', yaxt = 'n', type = 'n')
		axis1	<-	rep(Mb.axis, length(ms$Mb))
		axis2	<-	rep(cm.bt.top, length(ms$Mb))
		axis3	<-	rep(cm.rs.top, length(ms$Mb))
		axis4	<-	rep(cm.h.top, length(ms$Mb))
		# TICK MARKS AND ALL AXES
		segments(x0 = 0, x1 = -0.5, 
			y0 = seq(cm.h.top-1,cm.h.top,by=0.1), y1 = seq(cm.h.top-1,cm.h.top,by=0.1))
		segments(x0 = 0, x1 = -0.5, 
			y0 = seq(Mb.axis,Mb.axis+1,by=0.1), y1 = seq(Mb.axis,Mb.axis+1,by=0.1))
		segments(x0 = 0, x1 = xmax, y0 = cm.h.top-1, y1 = cm.h.top-1)
		segments(x0 = 0, x1 = xmax, y0 = cm.h.top, y1 = cm.h.top)
		segments(x0 = 0, x1 = xmax, y0 = cm.bt.top, y1 = cm.bt.top)
		segments(x0 = 0, x1 = xmax, y0 = cm.rs.top, y1 = cm.rs.top)
		segments(x0 = 0, x1 = xmax, y0 = Mb.axis, y1 = Mb.axis)
		segments(x0 = 0, x1 = xmax, y0 = Mb.axis+1, y1 = Mb.axis+1)		
		segments(x0 = 0, x1 = 0, y0 = cm.h.top-1, y1 = Mb.axis+1)
		segments(x0 = xmax, x1 = xmax, y0 = cm.h.top-1, y1 = Mb.axis+1)
		# write color key
		segments(x0 = xmax - (xmax/50), x1 = xmax, y0 = seq(Mb.axis+0.1,Mb.axis+0.9,length.out=7),col = colfx(7))
		# CHROMOSOME BREAKS IF 'GENOMIC'
		if (!(is.numeric(chr))) {chr.breaks(ybottom=Mb.axis, ytop=Mb.axis+1)}
		# ADD SEGMENTS CONNECTING MAPS
		segments(x0 = ms$cM.bt.scale, x1 = ms$Mb.scale, y0 = cm.bt.top+mapoffset
		,y1=Mb.axis, col = adjustcolor(cols, alpha=0.25), lwd = 2)
		segments(x0 = ms$cM.rs.scale, x1 = ms$cM.bt.scale, y0 = cm.rs.top+mapoffset,
				y1=cm.bt.top-mapoffset,col = adjustcolor(cols, alpha=0.25), lwd = 2)
		segments(x0 = ms$cM.h.scale, x1 = ms$cM.rs.scale, y0 = cm.h.top,
				y1=cm.rs.top-mapoffset, col = adjustcolor(cols, alpha=0.25), lwd = 2)
		# ADD SEGMENTS FOR BT, RS MAP MARKERS
		segments(x0 = ms$cM.bt.scale, x1 = ms$cM.bt.scale, 
				 y0 = cm.bt.top-mapoffset,y1=cm.bt.top+mapoffset,
				 col = adjustcolor(cols), lwd = 3)
		segments(x0 = ms$cM.rs.scale, x1 = ms$cM.rs.scale, 
				 y0 = cm.rs.top-mapoffset,y1=cm.rs.top+mapoffset,
				 col = adjustcolor(cols), lwd = 3)
		# ADD SEGMENTS FOR FST HEIGHT UNDER CURVES
		segments(x0 = ms$cM.h.scale, x1 = ms$cM.h.scale, y0 = ms$fst.cM,y1=cm.h.top,
				 col = cols)
		segments(x0 = ms$Mb.scale, x1 = ms$Mb.scale, y0 = ms$fst.Mb,y1=Mb.axis,
				 col = cols)
		# ADD CURVES
	ms	<-	ms[order(ms$Mb.scale),]
		lines(x = ms$Mb.scale, y = ms$fst.Mb)
		lines(x = ms$cM.h.scale, y = ms$fst.cM)
		# ADD SCALE BARS
		segments(x0 = 0.5, x1 = 5.5, y0 = Mb.axis+0.5, y1 = Mb.axis+0.5,
				lwd = 3)
			text(x = 5.5, y = Mb.axis+0.5, pos = 3, labels = "5 Mb")
		segments(x0 = 0.5, x1 = bt.scale.bar.len+0.5, 
				y0 = cm.bt.top+0.25, y1 = cm.bt.top+0.25,
				lwd = 3)
			text(x = bt.scale.bar.len+0.5, y = cm.bt.top+0.25, pos = 3, labels = "10 cM")
		segments(x0 = 0.5, x1 = rs.scale.bar.len+0.5, 
				y0 = cm.rs.top+0.25, y1 = cm.rs.top+0.25,
				lwd = 3)
			text(x = rs.scale.bar.len+0.5, y = cm.rs.top+0.25, pos = 3, labels = "10 cM")
		segments(x0 = 0.5, x1 = h.scale.bar.len+0.5, 
				y0 = cm.h.top-0.5, y1 = cm.h.top-0.5,
				lwd = 3)
			text(x = h.scale.bar.len+0.5, y = cm.h.top-0.25, pos = 1, labels = "10 cM")

}

plot.map.fst(chr = 21, low.col = "gray80", mid.col = "gray50", hi.col = "gray10")
plot.map.fst(chr = 'genomic', colmode = "NOT")


outdir <- paste0(baseDIR,"3.figures/2.drafts/scans/chromosomes/")

for (i in 1:21) {
	pdf(file = paste0(outdir,"fst_fullfams_chromogroup",i,".pdf"), width=5,height=5)
	plot.map.fst(chr = i, colmode = "NOT")
	dev.off()
}


###~~~~~~~~~~~~~~~~~~~~~~~~~~~~~~~~~~~~~~~~~~~~~~~~~~~###
###                                                   ###
###              DXY GENETIC MAP SCANS                ###
###                                                   ###
###~~~~~~~~~~~~~~~~~~~~~~~~~~~~~~~~~~~~~~~~~~~~~~~~~~~###

library(RColorBrewer)
library(wesanderson)

map.smoov	<-	read.table(paste0(baseDIR,"4.data/1.datasets/maps_smoothed_full_with99point9percCIs.tsv"), 
                sep = '\t', header = T)

map.smoov$dxy.scale	<-	scale.vals(map.smoov$dxy, 0.0,1)
map.smoov$dxy.grays	<-	1- scale.vals(map.smoov$dxy, 0.3,1)
map.smoov$dxy.grays	<-	hsv(0,0, map.smoov$dxy.grays)

plot.map.dxy	<-	function(chr = 21, colmode = 'grayscale') {
	chr	<-	chr
	colmode	<-	colmode
	if (is.numeric(chr)) {
		ms	<-	map.smoov[map.smoov$chr == chr,]
		Mb.max		<-	max(map.smoov$Mb, na.rm = TRUE)
		cM.max.bt	<-	max(map.smoov$cM.bt, na.rm = TRUE)
		cM.max.rs	<-	max(map.smoov$cM.rs, na.rm = TRUE)
		cM.max.h	<-	max(map.smoov$cM.h, na.rm = TRUE)
		cM.max		<-	max(cM.max.bt,cM.max.rs,cM.max.h)
	} else {
		ms <- map.smoov
		ms$Mb <- ms$Mb.genomic
		ms$cM.bt <- ms$bt.genomic
		ms$cM.rs <- ms$rs.genomic
		ms$cM.h  <- ms$h.genomic
		Mb.max		<-	max(ms$Mb, na.rm = TRUE)
		cM.max.bt	<-	max(ms$cM.bt, na.rm = TRUE)
		cM.max.rs	<-	max(ms$cM.rs, na.rm = TRUE)
		cM.max.h	<-	max(ms$cM.h, na.rm = TRUE)
		cM.max		<-	max(cM.max.bt,cM.max.rs,cM.max.h)
	}
	ms	<-	ms[order(ms$dxy.scale),]
	cols	<-	brewer.pal(10,'RdYlBu')
    cols	<-	rev(wes_palette("Zissou", 10, type = "continuous"))
    cols    <-  colorRampPalette(wes_palette("FantasticFox", 5)[c(3,2,4,5)])
    cols    <-  colorRampPalette(c(wes_palette("Zissou", 5)[1], wes_palette("Royal1", 4)[1], wes_palette("Zissou", 5)[5]))
    cols    <-  rev(cols(10))
	ms$col	<-	rep(			cols[1], dim(ms)[1])
		ms$col[ms$dxy < 0.01] <-	cols[1]
		ms$col[ms$dxy < 0.009] <-	cols[2]
		ms$col[ms$dxy < 0.008] <-	cols[3]
		ms$col[ms$dxy < 0.007] <-	cols[4]
		ms$col[ms$dxy < 0.006] <-	cols[5]
		ms$col[ms$dxy < 0.005] <-	cols[6]
		ms$col[ms$dxy < 0.004] <-	cols[7]
		ms$col[ms$dxy < 0.003] <-	cols[8]
		ms$col[ms$dxy < 0.002] <-	cols[9]
		ms$col[ms$dxy < 0.001] <-	cols[10]
	Mb.axis		<-	3.00 # y position to start Mb axis
	cm.bt.top	<-	2.50 # y position to be top (bottom) of cM-based Fst scan
	cm.rs.top	<-	2.00 # y position to be top (bottom) of cM-based Fst scan
	cm.h.top	<-	1.50 # y position to be top (bottom) of cM-based Fst scan
	mapwidth	<-	0.05 ; mapoffset	<-	mapwidth / 2
	ms$dxy.Mb	<-	ms$dxy.scale + Mb.axis
	ms$dxy.cM	<-	cm.h.top - ms$dxy.scale
	xmax		<-	Mb.max
	Mb.med		<-	(max(ms$Mb, na.rm=T) - min(ms$Mb, na.rm=T)) / 2
	cM.bt.med	<-	(max(ms$cM.bt, na.rm=T) - min(ms$cM.bt, na.rm=T)) / 2
	cM.rs.med	<-	(max(ms$cM.rs, na.rm=T) - min(ms$cM.rs, na.rm=T)) / 2
	cM.h.med	<-	(max(ms$cM.h, na.rm=T) - min(ms$cM.h, na.rm=T)) / 2

	# SCALE MB SO THAT MAX(CHR MB) == MAX(LG cM)
	Mb.med.glob	<-	Mb.max / 2
	Mb.med.diff	<-	Mb.med.glob - Mb.med
	ms$Mb.scale	<-	ms$Mb + Mb.med.diff
	# SCALE BOOT CROSS CENTIMORGANS TO TOTAL MAP LENGTH
	cM.bt.med.glob	<-	cM.max.bt / 2
	cM.bt.med.diff	<-	cM.bt.med.glob - cM.bt.med
	ms$cM.bt.scale	<-	(ms$cM.bt + cM.bt.med.diff) * (xmax/cM.max.bt)
	bt.scale.bar.len<-	10 * (xmax/cM.max.bt)
	# SCALE RABBIT CROSS CENTIMORGANS TO TOTAL MAP LENGTH
	cM.rs.med.glob	<-	cM.max.rs / 2
	cM.rs.med.diff	<-	cM.rs.med.glob - cM.rs.med
	ms$cM.rs.scale	<-	(ms$cM.rs + cM.rs.med.diff) * (xmax/cM.max.rs)
	rs.scale.bar.len<-	10 * (xmax/cM.max.rs)
	# SCALE HYBRID CROSS CENTIMORGANS TO TOTAL MAP LENGTH	
	cM.h.med.glob	<-	cM.max.h / 2
	cM.h.med.diff	<-	cM.h.med.glob - cM.h.med
	ms$cM.h.scale	<-	(ms$cM.h + cM.h.med.diff) * (xmax/cM.max.h)
	h.scale.bar.len	<-	10 * (xmax/cM.max.h)
	cols	<-	ms$col
	if (colmode == 'grayscale') {cols	<-	ms$dxy.grays}
	plot(0,0, xlim = c(0,xmax), ylim = c(0,Mb.axis+1), xlab = '', ylab = '',
		xaxt = 'n', yaxt = 'n', type = 'n')
		axis1	<-	rep(Mb.axis, length(ms$Mb))
		axis2	<-	rep(cm.bt.top, length(ms$Mb))
		axis3	<-	rep(cm.rs.top, length(ms$Mb))
		axis4	<-	rep(cm.h.top, length(ms$Mb))
		# TICK MARKS AND ALL AXES
		segments(x0 = 0, x1 = -0.5, 
			y0 = seq(cm.h.top-1,cm.h.top,by=0.1), y1 = seq(cm.h.top-1,cm.h.top,by=0.1))
		segments(x0 = 0, x1 = -0.5, 
			y0 = seq(Mb.axis,Mb.axis+1,by=0.1), y1 = seq(Mb.axis,Mb.axis+1,by=0.1))
		segments(x0 = 0, x1 = xmax, y0 = cm.h.top-1, y1 = cm.h.top-1)
		segments(x0 = 0, x1 = xmax, y0 = cm.h.top, y1 = cm.h.top)
		segments(x0 = 0, x1 = xmax, y0 = cm.bt.top, y1 = cm.bt.top)
		segments(x0 = 0, x1 = xmax, y0 = cm.rs.top, y1 = cm.rs.top)
		segments(x0 = 0, x1 = xmax, y0 = Mb.axis, y1 = Mb.axis)
		segments(x0 = 0, x1 = xmax, y0 = Mb.axis+1, y1 = Mb.axis+1)		
		segments(x0 = 0, x1 = 0, y0 = cm.h.top-1, y1 = Mb.axis+1)
		segments(x0 = xmax, x1 = xmax, y0 = cm.h.top-1, y1 = Mb.axis+1)
		# CHROMOSOME BREAKS IF 'GENOMIC'
		if (!(is.numeric(chr))) {chr.breaks(ybottom=Mb.axis, ytop=Mb.axis+1)}
		# ADD SEGMENTS CONNECTING MAPS
		segments(x0 = ms$cM.bt.scale, x1 = ms$Mb.scale, y0 = cm.bt.top+mapoffset
		,y1=Mb.axis, col = adjustcolor(cols, alpha=0.25), lwd = 2)
		segments(x0 = ms$cM.rs.scale, x1 = ms$cM.bt.scale, y0 = cm.rs.top+mapoffset,
				y1=cm.bt.top-mapoffset,col = adjustcolor(cols, alpha=0.25), lwd = 2)
		segments(x0 = ms$cM.h.scale, x1 = ms$cM.rs.scale, y0 = cm.h.top,
				y1=cm.rs.top-mapoffset, col = adjustcolor(cols, alpha=0.25), lwd = 2)
		# ADD SEGMENTS FOR BT, RS MAP MARKERS
		segments(x0 = ms$cM.bt.scale, x1 = ms$cM.bt.scale, 
				 y0 = cm.bt.top-mapoffset,y1=cm.bt.top+mapoffset,
				 col = adjustcolor(cols), lwd = 3)
		segments(x0 = ms$cM.rs.scale, x1 = ms$cM.rs.scale, 
				 y0 = cm.rs.top-mapoffset,y1=cm.rs.top+mapoffset,
				 col = adjustcolor(cols), lwd = 3)
		# ADD SEGMENTS FOR FST HEIGHT UNDER CURVES
		segments(x0 = ms$cM.h.scale, x1 = ms$cM.h.scale, y0 = ms$dxy.cM,y1=cm.h.top,
				 col = cols)
		segments(x0 = ms$Mb.scale, x1 = ms$Mb.scale, y0 = ms$dxy.Mb,y1=Mb.axis,
				 col = cols)
		# ADD CURVES
	ms	<-	ms[order(ms$Mb.scale),]
		lines(x = ms$Mb.scale, y = ms$dxy.Mb)
		lines(x = ms$cM.h.scale, y = ms$dxy.cM)
		# ADD SCALE BARS
		segments(x0 = 0.5, x1 = 5.5, y0 = Mb.axis+0.5, y1 = Mb.axis+0.5,
				lwd = 3)
			text(x = 5.5, y = Mb.axis+0.5, pos = 3, labels = "5 Mb")
		segments(x0 = 0.5, x1 = bt.scale.bar.len+0.5, 
				y0 = cm.bt.top+0.25, y1 = cm.bt.top+0.25,
				lwd = 3)
			text(x = bt.scale.bar.len+0.5, y = cm.bt.top+0.25, pos = 3, labels = "10 cM")
		segments(x0 = 0.5, x1 = rs.scale.bar.len+0.5, 
				y0 = cm.rs.top+0.25, y1 = cm.rs.top+0.25,
				lwd = 3)
			text(x = rs.scale.bar.len+0.5, y = cm.rs.top+0.25, pos = 3, labels = "10 cM")
		segments(x0 = 0.5, x1 = h.scale.bar.len+0.5, 
				y0 = cm.h.top-0.5, y1 = cm.h.top-0.5,
				lwd = 3)
			text(x = h.scale.bar.len+0.5, y = cm.h.top-0.25, pos = 1, labels = "10 cM")

}

plot.map.dxy(chr = "genomic", colmode = "NOT")
plot.map.dxy(chr = 21, colmode = "NOT")


outdir <- paste0(baseDIR,"3.figures/2.drafts/scans/chromosomes/")

for (i in 1:21) {
	pdf(file = paste0(outdir,"dxy_fullfams_chromogroup",i,".pdf"), width=5,height=5)
	plot.map.dxy(chr = i, colmode = "NOT")
	dev.off()
}


###~~~~~~~~~~~~~~~~~~~~~~~~~~~~~~~~~~~~~~~~~~~~~~~~~~~###
###                                                   ###
###            TMRCA GENETIC MAP SCANS                ###
###                                                   ###
###~~~~~~~~~~~~~~~~~~~~~~~~~~~~~~~~~~~~~~~~~~~~~~~~~~~###

library(RColorBrewer)
library(wesanderson)

map.smoov	<-	read.table(paste0(baseDIR,"4.data/1.datasets/maps_smoothed_full_with99point9percCIs.tsv"), 
                sep = '\t', header = T)

map.smoov$tmrca.scale	<-	scale.vals(map.smoov$tmrca, 0.163,0.82)
map.smoov$tmrca.grays	<-	1- scale.vals(map.smoov$tmrca, 0.3,1)
map.smoov$tmrca.grays	<-	hsv(0,0, map.smoov$tmrca.grays)

plot.map.tmrca	<-	function(chr = 21, colmode = 'grayscale') {
	chr	<-	chr
	colmode	<-	colmode
	if (is.numeric(chr)) {
		ms	<-	map.smoov[map.smoov$chr == chr,]
		Mb.max		<-	max(map.smoov$Mb, na.rm = TRUE)
		cM.max.bt	<-	max(map.smoov$cM.bt, na.rm = TRUE)
		cM.max.rs	<-	max(map.smoov$cM.rs, na.rm = TRUE)
		cM.max.h	<-	max(map.smoov$cM.h, na.rm = TRUE)
		cM.max		<-	max(cM.max.bt,cM.max.rs,cM.max.h)
	} else {
		ms <- map.smoov
		ms$Mb <- ms$Mb.genomic
		ms$cM.bt <- ms$bt.genomic
		ms$cM.rs <- ms$rs.genomic
		ms$cM.h  <- ms$h.genomic
		Mb.max		<-	max(ms$Mb, na.rm = TRUE)
		cM.max.bt	<-	max(ms$cM.bt, na.rm = TRUE)
		cM.max.rs	<-	max(ms$cM.rs, na.rm = TRUE)
		cM.max.h	<-	max(ms$cM.h, na.rm = TRUE)
		cM.max		<-	max(cM.max.bt,cM.max.rs,cM.max.h)
	}
	ms	<-	ms[order(ms$tmrca.scale),]
	# cols	<-	brewer.pal(9,'RdYlBu')
	# cols	<-	brewer.pal(9,'PiYG')
	cols	<-	rev(wes_palette("Zissou", 9, type = "continuous"))
	cols	<-  c("#006d2c","#ffffb2","#bd0026")
	cols    <- colorRampPalette(cols)
	cols    <- cols(9) ; cols <- rev(cols)
	ms$col	<-	rep(			cols[1], dim(ms)[1])
		ms$col[ms$tmrca < 11] <-	cols[1]
		ms$col[ms$tmrca < 10] <-	cols[2]
		ms$col[ms$tmrca < 9] <-	cols[3]
		ms$col[ms$tmrca < 8] <-	cols[4]
		ms$col[ms$tmrca < 7] <-	cols[5]
		ms$col[ms$tmrca < 6] <-	cols[6]
		ms$col[ms$tmrca < 5] <-	cols[7]
		ms$col[ms$tmrca < 4] <-	cols[8]
		ms$col[ms$tmrca < 3] <-	cols[9]
	Mb.axis		<-	3.00 # y position to start Mb axis
	cm.bt.top	<-	2.50 # y position to be top (bottom) of cM-based Fst scan
	cm.rs.top	<-	2.00 # y position to be top (bottom) of cM-based Fst scan
	cm.h.top	<-	1.50 # y position to be top (bottom) of cM-based Fst scan
	mapwidth	<-	0.05 ; mapoffset	<-	mapwidth / 2
	ms$tmrca.Mb	<-	ms$tmrca.scale + Mb.axis
	ms$tmrca.cM	<-	cm.h.top - ms$tmrca.scale
	xmax		<-	Mb.max
	Mb.med		<-	(max(ms$Mb, na.rm=T) - min(ms$Mb, na.rm=T)) / 2
	cM.bt.med	<-	(max(ms$cM.bt, na.rm=T) - min(ms$cM.bt, na.rm=T)) / 2
	cM.rs.med	<-	(max(ms$cM.rs, na.rm=T) - min(ms$cM.rs, na.rm=T)) / 2
	cM.h.med	<-	(max(ms$cM.h, na.rm=T) - min(ms$cM.h, na.rm=T)) / 2

	# SCALE MB SO THAT MAX(CHR MB) == MAX(LG cM)
	Mb.med.glob	<-	Mb.max / 2
	Mb.med.diff	<-	Mb.med.glob - Mb.med
	ms$Mb.scale	<-	ms$Mb + Mb.med.diff
	# SCALE BOOT CROSS CENTIMORGANS TO TOTAL MAP LENGTH
	cM.bt.med.glob	<-	cM.max.bt / 2
	cM.bt.med.diff	<-	cM.bt.med.glob - cM.bt.med
	ms$cM.bt.scale	<-	(ms$cM.bt + cM.bt.med.diff) * (xmax/cM.max.bt)
	bt.scale.bar.len<-	10 * (xmax/cM.max.bt)
	# SCALE RABBIT CROSS CENTIMORGANS TO TOTAL MAP LENGTH
	cM.rs.med.glob	<-	cM.max.rs / 2
	cM.rs.med.diff	<-	cM.rs.med.glob - cM.rs.med
	ms$cM.rs.scale	<-	(ms$cM.rs + cM.rs.med.diff) * (xmax/cM.max.rs)
	rs.scale.bar.len<-	10 * (xmax/cM.max.rs)
	# SCALE HYBRID CROSS CENTIMORGANS TO TOTAL MAP LENGTH	
	cM.h.med.glob	<-	cM.max.h / 2
	cM.h.med.diff	<-	cM.h.med.glob - cM.h.med
	ms$cM.h.scale	<-	(ms$cM.h + cM.h.med.diff) * (xmax/cM.max.h)
	h.scale.bar.len	<-	10 * (xmax/cM.max.h)
	cols	<-	ms$col
	if (colmode == 'grayscale') {cols	<-	ms$tmrca.grays}
	plot(0,0, xlim = c(0,xmax), ylim = c(0,Mb.axis+1), xlab = '', ylab = '',
		xaxt = 'n', yaxt = 'n', type = 'n')
		axis1	<-	rep(Mb.axis, length(ms$Mb))
		axis2	<-	rep(cm.bt.top, length(ms$Mb))
		axis3	<-	rep(cm.rs.top, length(ms$Mb))
		axis4	<-	rep(cm.h.top, length(ms$Mb))
		# TICK MARKS AND ALL AXES
		segments(x0 = 0, x1 = -0.5, 
			y0 = seq(cm.h.top-1,cm.h.top,length.out=11), y1 = seq(cm.h.top-1,cm.h.top,length.out=11))
		segments(x0 = 0, x1 = -0.5, 
			y0 = seq(Mb.axis,Mb.axis+1,length.out=11), y1 = seq(Mb.axis,Mb.axis+1,length.out=11))
		segments(x0 = 0, x1 = xmax, y0 = cm.h.top-1, y1 = cm.h.top-1)
		segments(x0 = 0, x1 = xmax, y0 = cm.h.top, y1 = cm.h.top)
		segments(x0 = 0, x1 = xmax, y0 = cm.bt.top, y1 = cm.bt.top)
		segments(x0 = 0, x1 = xmax, y0 = cm.rs.top, y1 = cm.rs.top)
		segments(x0 = 0, x1 = xmax, y0 = Mb.axis, y1 = Mb.axis)
		segments(x0 = 0, x1 = xmax, y0 = Mb.axis+1, y1 = Mb.axis+1)		
		segments(x0 = 0, x1 = 0, y0 = cm.h.top-1, y1 = Mb.axis+1)
		segments(x0 = xmax, x1 = xmax, y0 = cm.h.top-1, y1 = Mb.axis+1)
		# CHROMOSOME BREAKS IF 'GENOMIC'
		if (!(is.numeric(chr))) {chr.breaks(ybottom=Mb.axis, ytop=Mb.axis+1)}
		# ADD SEGMENTS CONNECTING MAPS
		segments(x0 = ms$cM.bt.scale, x1 = ms$Mb.scale, y0 = cm.bt.top+mapoffset
		,y1=Mb.axis, col = adjustcolor(cols, alpha=0.25), lwd = 2)
		segments(x0 = ms$cM.rs.scale, x1 = ms$cM.bt.scale, y0 = cm.rs.top+mapoffset,
				y1=cm.bt.top-mapoffset,col = adjustcolor(cols, alpha=0.25), lwd = 2)
		segments(x0 = ms$cM.h.scale, x1 = ms$cM.rs.scale, y0 = cm.h.top,
				y1=cm.rs.top-mapoffset, col = adjustcolor(cols, alpha=0.25), lwd = 2)
		# ADD SEGMENTS FOR BT, RS MAP MARKERS
		segments(x0 = ms$cM.bt.scale, x1 = ms$cM.bt.scale, 
				 y0 = cm.bt.top-mapoffset,y1=cm.bt.top+mapoffset,
				 col = adjustcolor(cols), lwd = 3)
		segments(x0 = ms$cM.rs.scale, x1 = ms$cM.rs.scale, 
				 y0 = cm.rs.top-mapoffset,y1=cm.rs.top+mapoffset,
				 col = adjustcolor(cols), lwd = 3)
		# ADD SEGMENTS FOR FST HEIGHT UNDER CURVES
		segments(x0 = ms$cM.h.scale, x1 = ms$cM.h.scale, y0 = ms$tmrca.cM,y1=cm.h.top,
				 col = cols)
		segments(x0 = ms$Mb.scale, x1 = ms$Mb.scale, y0 = ms$tmrca.Mb,y1=Mb.axis,
				 col = cols)
		# ADD CURVES
	ms	<-	ms[order(ms$Mb.scale),]
		lines(x = ms$Mb.scale, y = ms$tmrca.Mb)
		lines(x = ms$cM.h.scale, y = ms$tmrca.cM)
		# ADD SCALE BARS
		segments(x0 = 0.5, x1 = 5.5, y0 = Mb.axis+0.5, y1 = Mb.axis+0.5,
				lwd = 3)
			text(x = 5.5, y = Mb.axis+0.5, pos = 3, labels = "5 Mb")
		segments(x0 = 0.5, x1 = bt.scale.bar.len+0.5, 
				y0 = cm.bt.top+0.25, y1 = cm.bt.top+0.25,
				lwd = 3)
			text(x = bt.scale.bar.len+0.5, y = cm.bt.top+0.25, pos = 3, labels = "10 cM")
		segments(x0 = 0.5, x1 = rs.scale.bar.len+0.5, 
				y0 = cm.rs.top+0.25, y1 = cm.rs.top+0.25,
				lwd = 3)
			text(x = rs.scale.bar.len+0.5, y = cm.rs.top+0.25, pos = 3, labels = "10 cM")
		segments(x0 = 0.5, x1 = h.scale.bar.len+0.5, 
				y0 = cm.h.top-0.5, y1 = cm.h.top-0.5,
				lwd = 3)
			text(x = h.scale.bar.len+0.5, y = cm.h.top-0.25, pos = 1, labels = "10 cM")

}

plot.map.tmrca(chr = "genomic", colmode = "NOT")
plot.map.tmrca(chr = 1, colmode = "NOT")
plot.map.tmrca(chr = 11, colmode = "NOT")
plot.map.tmrca(chr = 19, colmode = "NOT")
plot.map.tmrca(chr = 21, colmode = "NOT")


outdir <- paste0(baseDIR,"3.figures/2.drafts/scans/chromosomes/")

for (i in 1:21) {
	pdf(file = paste0(outdir,"TMRCA_fulfam_chromogroup",i,".pdf"), width=5,height=5)
	plot.map.tmrca(chr = i, colmode = "NOT")
	dev.off()
}


###~~~~~~~~~~~~~~~~~~~~~~~~~~~~~~~~~~~~~~~~~~~~~~~~~~~~~~~~~~~~~~~~~~~~~~~~~~~~~###
###~~~~~~~~~~~~~~~~~~~~~~~~~~~~~~~~~~~~~~~~~~~~~~~~~~~~~~~~~~~~~~~~~~~~~~~~~~~~~###
###~~~~~~~~~~~~~~~~~~~~~~~~~~~~~~~~~~~~~~~~~~~~~~~~~~~~~~~~~~~~~~~~~~~~~~~~~~~~~###
###~~~~~~~~~~~~~~~~~~~~~~~~~~~~~~~~~~~~~~~~~~~~~~~~~~~~~~~~~~~~~~~~~~~~~~~~~~~~~###
###~~~~~~~~~~~~~~~~~~~~~~~~~~~~~~~~~~~~~~~~~~~~~~~~~~~~~~~~~~~~~~~~~~~~~~~~~~~~~###
###~~~~~~~~~~~~~~~~~~~~~~~~~~~~~~~~~~~~~~~~~~~~~~~~~~~~~~~~~~~~~~~~~~~~~~~~~~~~~###
###~~~~~~~~~~~~~~~~~~~~~~~~~~~~~~~~~~~~~~~~~~~~~~~~~~~~~~~~~~~~~~~~~~~~~~~~~~~~~###
###~~~~~~~~~~~~~~~~~~~~~~~~~~~~~~~~~~~~~~~~~~~~~~~~~~~~~~~~~~~~~~~~~~~~~~~~~~~~~###
###~~~~~~~~~~~~~~~~~~~~~~~~~~~~~~~~~~~~~~~~~~~~~~~~~~~~~~~~~~~~~~~~~~~~~~~~~~~~~###


###~~~~~~~~~~~~~~~~~~~~~~~~~~~~~~~~~~~~~~~~~###
###                                         ###
###                   FST                   ###
###                                         ###
###~~~~~~~~~~~~~~~~~~~~~~~~~~~~~~~~~~~~~~~~~###

library(RColorBrewer)
# display.brewer.all()

map    <-    maps[maps$map == 'BT',]
bw    <-    0.25

map.smoov    <-    NULL

for (i in 1:21)    {
#    i = 1
    m    <-    map[map$chr == i,]
    p    <-    popgen[popgen$chr == i,]
    # Get chr length from LGs.info
    len    <-    LGs.info$LGs.len[LGs.info$groups == i]
    range.x    <-    c(0,len / 1000000) # set range for ksmooth
    # map will have fewer data points, so use that as n.points
    n.points    <-    dim(m)[1]
    cm.sm        <-    ksmooth(m$Mb, m$cM_01, kernel = 'normal', bandwidth = bw,
                        range.x = range.x, n.points = n.points)    
    pi.sm        <-    ksmooth(p$Mb, p$fst.rsbt, kernel = 'normal', bandwidth = bw,
                        range.x = range.x, n.points = n.points)
    Mb    <-    cm.sm$x
    cM    <-    cm.sm$y
    fst    <-    pi.sm$y
    chr    <-    rep(i, length(Mb))
    
    sm    <-    data.frame(chr,Mb,cM,fst)
    map.smoov    <-    rbind(map.smoov,sm)
}


# PICK A CHROMOSOME!
#  PLOT WILL BE SCALED TO THE MAX(CHR LENGTH) ON TOP
#  AND MAX(LG LENGTH) ON BOTTOM

Mb.max    <-    max(map.smoov$Mb, na.rm = TRUE)
cM.max    <-    max(map.smoov$cM, na.rm = TRUE)

    
    chr    <-    4
    
    ms    <-    map.smoov[map.smoov$chr == chr,]
    cols    <-    heat.colors(7)
    cols    <-    brewer.pal(7,'RdYlBu')
    # cols    <-    brewer.pal(9,'Greys')
    # cols    <-    brewer.pal(9,'Blues')
    ms$col    <-    rep(            cols[1], dim(ms)[1])
        ms$col[ms$fst < 0.6] <-    cols[2]
        ms$col[ms$fst < 0.5] <-    cols[3]
        ms$col[ms$fst < 0.4] <-    cols[4]
        ms$col[ms$fst < 0.3] <-    cols[5]
        ms$col[ms$fst < 0.2] <-    cols[6]
        ms$col[ms$fst < 0.1] <-    cols[7]
    Mb.axis    <-    2 # y position to start Mb axis
    cm.top    <-    1.75 # y position to be top (bottom) of cM-based Fst scan
    ms$fst.Mb    <-    ms$fst + Mb.axis
    ms$fst.cM    <-    cm.top - ms$fst
    xmax        <-    cM.max
    Mb.med        <-    (max(ms$Mb, na.rm=T) - min(ms$Mb, na.rm=T)) / 2
    cM.med        <-    (max(ms$cM, na.rm=T) - min(ms$cM, na.rm=T)) / 2
    Mb.med.glob    <-    Mb.max / 2
    cM.med.glob    <-    cM.max / 2
    Mb.med.diff    <-    Mb.med.glob - Mb.med
    cM.med.diff    <-    cM.med.glob - cM.med
    ms$cM.scale    <-    ms$cM + cM.med.diff
    
    
    # ms$Mb.scale    <-    ms$Mb + Mb.med.diff
    # SCALE MB SO THAT MAX(CHR MB) == MAX(LG cM)
        Mb2cM    <-    Mb.max / cM.max
    ms$Mb.scale    <-    ms$Mb / Mb2cM
    ms$Mb.scale    <-    ms$Mb.scale + (Mb.med.diff / Mb2cM)
    
    plot(0,0, xlim = c(0,xmax), ylim = c(0,3), xlab = '', ylab = '',
        xaxt = 'n', yaxt = 'n', type = 'n')
        axis1    <-    rep(Mb.axis, length(ms$Mb))
        axis2    <-    rep(cm.top, length(ms$Mb))
        segments(x0 = 0, x1 = 0.25, 
            y0 = seq(cm.top-1,cm.top,by=0.1), y1 = seq(cm.top-1,cm.top,by=0.1))
        segments(x0 = 0, x1 = 0.25, 
            y0 = seq(Mb.axis,Mb.axis+1,by=0.1), y1 = seq(Mb.axis,Mb.axis+1,by=0.1))
        segments(x0 = 0, x1 = xmax, y0 = cm.top-1, y1 = cm.top-1)
        segments(x0 = 0, x1 = xmax, y0 = cm.top, y1 = cm.top)
        segments(x0 = 0, x1 = xmax, y0 = Mb.axis, y1 = Mb.axis)
        segments(x0 = 0, x1 = xmax, y0 = Mb.axis+1, y1 = Mb.axis+1)
        segments(x0 = 0, x1 = 0, y0 = cm.top-1, y1 = Mb.axis+1)
        # segments(x0 = 5, x1 = 5, y0 = Mb.axis + 0.75, y1 = Mb.axis+1)
        # segments(x0 = 10, x1 = 10, y0 = Mb.axis + 0.75, y1 = Mb.axis+1)
        # segments(x0 = 5/Mb2cM, x1 = 5/Mb2cM, y0 = cm.top - 1, y1 = cm.top - 0.75)
        # segments(x0 = 10/Mb2cM, x1 = 10/Mb2cM, y0 = cm.top - 1, y1 = cm.top - 0.75)
        segments(x0 = xmax, x1 = xmax, y0 = cm.top-1, y1 = Mb.axis+1)
        # polygon(x = c(ms$Mb,rev(ms$Mb)),
                # y = c(ms$fst.Mb, axis1), col = 'white')
        # polygon(x = c(ms$cM.scale,rev(ms$cM.scale)), 
                # y = c(ms$fst.cM, axis2), col = 'white')
        segments(x0 = ms$cM.scale, x1 = ms$Mb.scale, y0 = cm.top,y1=Mb.axis,
                 col = adjustcolor(ms$col, alpha=0.25), lwd = 2)
        segments(x0 = ms$cM.scale, x1 = ms$cM.scale, y0 = ms$fst.cM,y1=cm.top,
                 col = ms$col)
        segments(x0 = ms$Mb.scale, x1 = ms$Mb.scale, y0 = ms$fst.Mb,y1=Mb.axis,
                 col = ms$col)
        lines(x = ms$Mb.scale, y = ms$fst.Mb)
        lines(x = ms$cM.scale, y = ms$fst.cM)
    # outfile = ""
    # pdf(file = )

###~~~~~~~~~~~~~~~~~~~~~~~~~~~~~~~~~~~~~~~~~~~~~~###
###                GENOME-WIDE SUMMARIES             ###
###~~~~~~~~~~~~~~~~~~~~~~~~~~~~~~~~~~~~~~~~~~~~~~###

hist(map.smoov$fst)

###~~~~~~~~~~~~~~~~~~~~~~~~~~~~~~~~~~~~~~~~~~~~~~###
###    PLOT ALL CHROMOSOMES TO INDIVIDUAL FILES     ###
###~~~~~~~~~~~~~~~~~~~~~~~~~~~~~~~~~~~~~~~~~~~~~~###

outdir    <-    "/Users/thom/Dropbox/Shared_with_Bill/0.Dissertation_Chapters/3.Recombination/02.Figures/01.Drafts/phys2genetBT/"
suffix    <-    "_FSTvsPhysicalAndGenetic.pdf"
width    <-    5
height    <-    5
for (i in 1:21)    {
    chr    <-    i    
    outfile = paste0(outdir,"chr",i,suffix)
    ms    <-    map.smoov[map.smoov$chr == chr,]
    cols    <-    heat.colors(7)
    cols    <-    brewer.pal(7,'RdYlBu')
    # cols    <-    brewer.pal(9,'Greys')
    # cols    <-    brewer.pal(9,'Blues')
    ms$col    <-    rep(            cols[1], dim(ms)[1])
        ms$col[ms$fst < 0.6] <-    cols[2]
        ms$col[ms$fst < 0.5] <-    cols[3]
        ms$col[ms$fst < 0.4] <-    cols[4]
        ms$col[ms$fst < 0.3] <-    cols[5]
        ms$col[ms$fst < 0.2] <-    cols[6]
        ms$col[ms$fst < 0.1] <-    cols[7]
    Mb.axis    <-    2 # y position to start Mb axis
    cm.top    <-    1.75 # y position to be top (bottom) of cM-based Fst scan
    ms$fst.Mb    <-    ms$fst + Mb.axis
    ms$fst.cM    <-    cm.top - ms$fst
    xmax        <-    cM.max
    Mb.med        <-    (max(ms$Mb, na.rm=T) - min(ms$Mb, na.rm=T)) / 2
    cM.med        <-    (max(ms$cM, na.rm=T) - min(ms$cM, na.rm=T)) / 2
    Mb.med.glob    <-    Mb.max / 2
    cM.med.glob    <-    cM.max / 2
    Mb.med.diff    <-    Mb.med.glob - Mb.med
    cM.med.diff    <-    cM.med.glob - cM.med
    ms$cM.scale    <-    ms$cM + cM.med.diff
    # SCALE MB SO THAT MAX(CHR MB) == MAX(LG cM)
        Mb2cM    <-    Mb.max / cM.max
    ms$Mb.scale    <-    ms$Mb / Mb2cM
    ms$Mb.scale    <-    ms$Mb.scale + (Mb.med.diff / Mb2cM)
    pdf(file=outfile, width = width, height = height)    
    plot(0,0, xlim = c(0,xmax), ylim = c(0,3), xlab = '', ylab = '',
        xaxt = 'n', yaxt = 'n', type = 'n')
        axis1    <-    rep(Mb.axis, length(ms$Mb))
        axis2    <-    rep(cm.top, length(ms$Mb))
        segments(x0 = 0, x1 = 0.25, 
            y0 = seq(cm.top-1,cm.top,by=0.1), y1 = seq(cm.top-1,cm.top,by=0.1))
        segments(x0 = 0, x1 = 0.25, 
            y0 = seq(Mb.axis,Mb.axis+1,by=0.1), y1 = seq(Mb.axis,Mb.axis+1,by=0.1))
        segments(x0 = 0, x1 = xmax, y0 = cm.top-1, y1 = cm.top-1)
        segments(x0 = 0, x1 = xmax, y0 = cm.top, y1 = cm.top)
        segments(x0 = 0, x1 = xmax, y0 = Mb.axis, y1 = Mb.axis)
        segments(x0 = 0, x1 = xmax, y0 = Mb.axis+1, y1 = Mb.axis+1)
        segments(x0 = 0, x1 = 0, y0 = cm.top-1, y1 = Mb.axis+1)
        # segments(x0 = 5, x1 = 5, y0 = Mb.axis + 0.75, y1 = Mb.axis+1)
        # segments(x0 = 10, x1 = 10, y0 = Mb.axis + 0.75, y1 = Mb.axis+1)
        # segments(x0 = 5/Mb2cM, x1 = 5/Mb2cM, y0 = cm.top - 1, y1 = cm.top - 0.75)
        # segments(x0 = 10/Mb2cM, x1 = 10/Mb2cM, y0 = cm.top - 1, y1 = cm.top - 0.75)
        segments(x0 = xmax, x1 = xmax, y0 = cm.top-1, y1 = Mb.axis+1)
        # polygon(x = c(ms$Mb,rev(ms$Mb)),
                # y = c(ms$fst.Mb, axis1), col = 'white')
        # polygon(x = c(ms$cM.scale,rev(ms$cM.scale)), 
                # y = c(ms$fst.cM, axis2), col = 'white')
        segments(x0 = ms$cM.scale, x1 = ms$Mb.scale, y0 = cm.top,y1=Mb.axis,
                 col = adjustcolor(ms$col, alpha=0.25), lwd = 2)
        segments(x0 = ms$cM.scale, x1 = ms$cM.scale, y0 = ms$fst.cM,y1=cm.top,
                 col = ms$col)
        segments(x0 = ms$Mb.scale, x1 = ms$Mb.scale, y0 = ms$fst.Mb,y1=Mb.axis,
                 col = ms$col)
        lines(x = ms$Mb.scale, y = ms$fst.Mb)
        lines(x = ms$cM.scale, y = ms$fst.cM)
    dev.off()
}


###~~~~~~~~~~~~~~~~~~~~~~~~~~~~~~~~~~~~~~~~~###
###                                         ###
###            GENETIC MAP SCANS - DXY      ###
###                                         ###
###~~~~~~~~~~~~~~~~~~~~~~~~~~~~~~~~~~~~~~~~~###

library(RColorBrewer)
# display.brewer.all()

map    <-    maps[maps$map == 'BTRS',]
bw    <-    0.25

LGs.info    <-    read.table("~/Dropbox/Data/active/GacNewLGs.tsv", sep = "\t", 
                            header = TRUE, stringsAsFactors = FALSE)
    group    <-    2    # ***column in which to find 'group' label (You specify)
    bp        <-    3    # ***column in which to find chromosome-specific bp position (You specify)
    cat("Using genome assembly from Glazer et al.\n")


map.smoov    <-    NULL

for (i in 1:21)    {
#    i = 1
    m    <-    map[map$chr == i,]
    p    <-    popgen[popgen$chr == i,]
    # Get chr length from LGs.info
    len    <-    LGs.info$LGs.len[LGs.info$groups == i]
    range.x    <-    c(0,len / 1000000) # set range for ksmooth
    # map will have fewer data points, so use that as n.points
    n.points    <-    dim(m)[1]
    cm.sm        <-    ksmooth(m$Mb, m$cM_01, kernel = 'normal', bandwidth = bw,
                        range.x = range.x, n.points = n.points)    
    pi.sm        <-    ksmooth(p$Mb, p$dxy, kernel = 'normal', bandwidth = bw,
                        range.x = range.x, n.points = n.points)
    Mb    <-    cm.sm$x
    cM    <-    cm.sm$y
    dxy    <-    pi.sm$y
    chr    <-    rep(i, length(Mb))
    
    sm    <-    data.frame(chr,Mb,cM,dxy)
    map.smoov    <-    rbind(map.smoov,sm)
}


# PICK A CHROMOSOME!
#  PLOT WILL BE SCALED TO THE MAX(CHR LENGTH) ON TOP
#  AND MAX(LG LENGTH) ON BOTTOM

Mb.max    <-    max(map.smoov$Mb, na.rm = TRUE)
cM.max    <-    max(map.smoov$cM, na.rm = TRUE)

hist(map.smoov$dxy, breaks = seq(0,0.04,by=0.001))
    max.dxy    <-    max(map.smoov$dxy, na.rm = TRUE)

dxy.breaks    <-    c(0.002, 0.004, 0.006, 0.008, 0.01, 0.015)
chr            <-    4

ms    <-    map.smoov[map.smoov$chr == chr,]
ms$dxy.scale    <-    ms$dxy / max.dxy
dxy.breaks        <-    dxy.breaks / max.dxy
cols    <-    heat.colors(7)
cols    <-    brewer.pal(7,'RdYlBu')
# col.ramp<-    colorRamp("red","yellow","blue")
# cols    <-    brewer.pal(9,'Greys') ; cols <- rev(cols)
ms$col    <-    rep(            cols[1], dim(ms)[1])
    ms$col[ms$dxy.scale < 0.7] <-    cols[2]
    ms$col[ms$dxy.scale < 0.6] <-    cols[3]
    ms$col[ms$dxy.scale < 0.5] <-    cols[4]
    ms$col[ms$dxy.scale < 0.4] <-    cols[5]
    ms$col[ms$dxy.scale < 0.3] <-    cols[6]
    ms$col[ms$dxy.scale < 0.2] <-    cols[7]
Mb.axis    <-    2 # y position to start Mb axis
cm.top    <-    1.75 # y position to be top (bottom) of cM-based dxy scan
ms$dxy.Mb    <-    ms$dxy.scale + Mb.axis
ms$dxy.cM    <-    cm.top - ms$dxy.scale
xmax        <-    cM.max
Mb.med        <-    (max(ms$Mb, na.rm=T) - min(ms$Mb, na.rm=T)) / 2
cM.med        <-    (max(ms$cM, na.rm=T) - min(ms$cM, na.rm=T)) / 2
Mb.med.glob    <-    Mb.max / 2
cM.med.glob    <-    cM.max / 2
Mb.med.diff    <-    Mb.med.glob - Mb.med
cM.med.diff    <-    cM.med.glob - cM.med
ms$cM.scale    <-    ms$cM + cM.med.diff


# ms$Mb.scale    <-    ms$Mb + Mb.med.diff
# SCALE MB SO THAT MAX(CHR MB) == MAX(LG cM)
    Mb2cM    <-    Mb.max / cM.max
ms$Mb.scale    <-    ms$Mb / Mb2cM
ms$Mb.scale    <-    ms$Mb.scale + (Mb.med.diff / Mb2cM)

plot(0,0, xlim = c(0,xmax), ylim = c(0,3), xlab = '', ylab = '',
    xaxt = 'n', yaxt = 'n', type = 'n')
    axis1    <-    rep(Mb.axis, length(ms$Mb))
    axis2    <-    rep(cm.top, length(ms$Mb))
    segments(x0 = 0, x1 = 0.25, 
        y0 = seq(cm.top-1,cm.top,by=0.1), y1 = seq(cm.top-1,cm.top,by=0.1))
    segments(x0 = 0, x1 = 0.25, 
        y0 = seq(Mb.axis,Mb.axis+1,by=0.1), y1 = seq(Mb.axis,Mb.axis+1,by=0.1))
    segments(x0 = 0, x1 = xmax, y0 = cm.top-1, y1 = cm.top-1)
    segments(x0 = 0, x1 = xmax, y0 = cm.top, y1 = cm.top)
    segments(x0 = 0, x1 = xmax, y0 = Mb.axis, y1 = Mb.axis)
    segments(x0 = 0, x1 = xmax, y0 = Mb.axis+1, y1 = Mb.axis+1)
    segments(x0 = 0, x1 = 0, y0 = cm.top-1, y1 = Mb.axis+1)
    # segments(x0 = 5, x1 = 5, y0 = Mb.axis + 0.75, y1 = Mb.axis+1)
    # segments(x0 = 10, x1 = 10, y0 = Mb.axis + 0.75, y1 = Mb.axis+1)
    # segments(x0 = 5/Mb2cM, x1 = 5/Mb2cM, y0 = cm.top - 1, y1 = cm.top - 0.75)
    # segments(x0 = 10/Mb2cM, x1 = 10/Mb2cM, y0 = cm.top - 1, y1 = cm.top - 0.75)
    segments(x0 = xmax, x1 = xmax, y0 = cm.top-1, y1 = Mb.axis+1)
    # polygon(x = c(ms$Mb,rev(ms$Mb)),
            # y = c(ms$dxy.Mb, axis1), col = 'white')
    # polygon(x = c(ms$cM.scale,rev(ms$cM.scale)), 
            # y = c(ms$dxy.cM, axis2), col = 'white')
    segments(x0 = ms$cM.scale, x1 = ms$Mb.scale, y0 = cm.top,y1=Mb.axis,
             col = adjustcolor(ms$col, alpha=0.25), lwd = 2)
    segments(x0 = ms$cM.scale, x1 = ms$cM.scale, y0 = ms$dxy.cM,y1=cm.top,
             col = ms$col)
    segments(x0 = ms$Mb.scale, x1 = ms$Mb.scale, y0 = ms$dxy.Mb,y1=Mb.axis,
             col = ms$col)
    lines(x = ms$Mb.scale, y = ms$dxy.Mb)
    lines(x = ms$cM.scale, y = ms$dxy.cM)


###~~~~~~~~~~~~~~~~~~~~~~~~~~~~~~~~~~~~~~~~~~~~~~###
###                GENOME-WIDE SUMMARIES             ###
###~~~~~~~~~~~~~~~~~~~~~~~~~~~~~~~~~~~~~~~~~~~~~~###

hist(map.smoov$dxy, breaks = seq(0,0.04,by=0.001))
    max.dxy    <-    max(map.smoov$dxy)


###~~~~~~~~~~~~~~~~~~~~~~~~~~~~~~~~~~~~~~~~~~~~~~###
###    PLOT ALL CHROMOSOMES TO INDIVIDUAL FILES     ###
###~~~~~~~~~~~~~~~~~~~~~~~~~~~~~~~~~~~~~~~~~~~~~~###

outdir    <-    "/Users/thom/Dropbox/Shared_with_Bill/0.Dissertation_Chapters/3.Recombination/02.Figures/01.Drafts/phys2genetBTRS/dxy/"
suffix    <-    "_DXYvsPhysicalAndGenetic.pdf"
width    <-    5
height    <-    5
for (i in 1:21)    {
    chr    <-    i    
    outfile = paste0(outdir,"chr",i,suffix)
    ms    <-    map.smoov[map.smoov$chr == chr,]
    ms$dxy.scale    <-    ms$dxy / max(map.smoov$dxy, na.rm = TRUE)
    cols    <-    heat.colors(7)
    cols    <-    brewer.pal(7,'RdYlBu')
    # cols    <-    brewer.pal(8,'RdYlGn')
    # cols    <-    brewer.pal(9,'Greys') ; cols <- rev(cols)
    # cols    <-    brewer.pal(9,'Blues')
    ms$col    <-    rep(            cols[1], dim(ms)[1])
        ms$col[ms$dxy.scale < 0.6] <-    cols[2]
        ms$col[ms$dxy.scale < 0.5] <-    cols[3]
        ms$col[ms$dxy.scale < 0.4] <-    cols[4]
        ms$col[ms$dxy.scale < 0.3] <-    cols[5]
        ms$col[ms$dxy.scale < 0.2] <-    cols[6]
        ms$col[ms$dxy.scale < 0.1] <-    cols[7]
    Mb.axis    <-    2 # y position to start Mb axis
    cm.top    <-    1.75 # y position to be top (bottom) of cM-based dxy scan
    ms$dxy.Mb    <-    ms$dxy.scale + Mb.axis
    ms$dxy.cM    <-    cm.top - ms$dxy.scale
    xmax        <-    cM.max
    Mb.med        <-    (max(ms$Mb, na.rm=T) - min(ms$Mb, na.rm=T)) / 2
    cM.med        <-    (max(ms$cM, na.rm=T) - min(ms$cM, na.rm=T)) / 2
    Mb.med.glob    <-    Mb.max / 2
    cM.med.glob    <-    cM.max / 2
    Mb.med.diff    <-    Mb.med.glob - Mb.med
    cM.med.diff    <-    cM.med.glob - cM.med
    ms$cM.scale    <-    ms$cM + cM.med.diff
    # SCALE MB SO THAT MAX(CHR MB) == MAX(LG cM)
        Mb2cM    <-    Mb.max / cM.max
    ms$Mb.scale    <-    ms$Mb / Mb2cM
    ms$Mb.scale    <-    ms$Mb.scale + (Mb.med.diff / Mb2cM)
    pdf(file=outfile, width = width, height = height)    
    plot(0,0, xlim = c(0,xmax), ylim = c(0,3), xlab = '', ylab = '',
        xaxt = 'n', yaxt = 'n', type = 'n')
        axis1    <-    rep(Mb.axis, length(ms$Mb))
        axis2    <-    rep(cm.top, length(ms$Mb))
        segments(x0 = 0, x1 = 0.25, 
            y0 = seq(cm.top-1,cm.top,by=0.1), y1 = seq(cm.top-1,cm.top,by=0.1))
        segments(x0 = 0, x1 = 0.25, 
            y0 = seq(Mb.axis,Mb.axis+1,by=0.1), y1 = seq(Mb.axis,Mb.axis+1,by=0.1))
        segments(x0 = 0, x1 = xmax, y0 = cm.top-1, y1 = cm.top-1)
        segments(x0 = 0, x1 = xmax, y0 = cm.top, y1 = cm.top)
        segments(x0 = 0, x1 = xmax, y0 = Mb.axis, y1 = Mb.axis)
        segments(x0 = 0, x1 = xmax, y0 = Mb.axis+1, y1 = Mb.axis+1)
        segments(x0 = 0, x1 = 0, y0 = cm.top-1, y1 = Mb.axis+1)
        # segments(x0 = 5, x1 = 5, y0 = Mb.axis + 0.75, y1 = Mb.axis+1)
        # segments(x0 = 10, x1 = 10, y0 = Mb.axis + 0.75, y1 = Mb.axis+1)
        # segments(x0 = 5/Mb2cM, x1 = 5/Mb2cM, y0 = cm.top - 1, y1 = cm.top - 0.75)
        # segments(x0 = 10/Mb2cM, x1 = 10/Mb2cM, y0 = cm.top - 1, y1 = cm.top - 0.75)
        segments(x0 = xmax, x1 = xmax, y0 = cm.top-1, y1 = Mb.axis+1)
        # polygon(x = c(ms$Mb,rev(ms$Mb)),
                # y = c(ms$dxy.Mb, axis1), col = 'white')
        # polygon(x = c(ms$cM.scale,rev(ms$cM.scale)), 
                # y = c(ms$dxy.cM, axis2), col = 'white')
        segments(x0 = ms$cM.scale, x1 = ms$Mb.scale, y0 = cm.top,y1=Mb.axis,
                 col = adjustcolor(ms$col, alpha=0.25), lwd = 2)
        segments(x0 = ms$cM.scale, x1 = ms$cM.scale, y0 = ms$dxy.cM,y1=cm.top,
                 col = ms$col)
        segments(x0 = ms$Mb.scale, x1 = ms$Mb.scale, y0 = ms$dxy.Mb,y1=Mb.axis,
                 col = ms$col)
        lines(x = ms$Mb.scale, y = ms$dxy.Mb)
        lines(x = ms$cM.scale, y = ms$dxy.cM)
    dev.off()
}


###~~~~~~~~~~~~~~~~~~~~~~~~~~~~~~~~~~~~~~~~~###
###                                            ###
###            GENETIC MAP SCANS - PI            ###
###                                            ###
###~~~~~~~~~~~~~~~~~~~~~~~~~~~~~~~~~~~~~~~~~###

library(RColorBrewer)
# display.brewer.all()

map    <-    maps[maps$map == 'BTRS',]
bw    <-    0.25

LGs.info    <-    read.table("~/Dropbox/Data/active/GacNewLGs.tsv", sep = "\t", 
                            header = TRUE, stringsAsFactors = FALSE)
    group    <-    2    # ***column in which to find 'group' label (You specify)
    bp        <-    3    # ***column in which to find chromosome-specific bp position (You specify)
    cat("Using genome assembly from Glazer et al.\n")


map.smoov    <-    NULL

for (i in 1:21)    {
#    i = 1
    m    <-    map[map$chr == i,]
    p    <-    popgen[popgen$chr == i,]
    # Get chr length from LGs.info
    len    <-    LGs.info$LGs.len[LGs.info$groups == i]
    range.x    <-    c(0,len / 1000000) # set range for ksmooth
    # map will have fewer data points, so use that as n.points
    n.points    <-    dim(m)[1]
    cm.sm        <-    ksmooth(m$Mb, m$cM_01, kernel = 'normal', bandwidth = bw,
                        range.x = range.x, n.points = n.points)    
    pi.sm        <-    ksmooth(p$Mb, p$pi, kernel = 'normal', bandwidth = bw,
                        range.x = range.x, n.points = n.points)
    Mb    <-    cm.sm$x
    cM    <-    cm.sm$y
    pi    <-    pi.sm$y
    chr    <-    rep(i, length(Mb))
    
    sm    <-    data.frame(chr,Mb,cM,pi)
    map.smoov    <-    rbind(map.smoov,sm)
}


# PICK A CHROMOSOME!
#  PLOT WILL BE SCALED TO THE MAX(CHR LENGTH) ON TOP
#  AND MAX(LG LENGTH) ON BOTTOM

Mb.max    <-    max(map.smoov$Mb, na.rm = TRUE)
cM.max    <-    max(map.smoov$cM, na.rm = TRUE)

chr    <-    4

ms    <-    map.smoov[map.smoov$chr == chr,]
ms$pi.scale    <-    ms$pi / max(map.smoov$pi, na.rm = TRUE)
cols    <-    heat.colors(7)
cols    <-    brewer.pal(9,'RdYlBu')
# cols    <-    brewer.pal(8,'RdYlGn')
# cols    <-    brewer.pal(9,'Greys')
# cols    <-    brewer.pal(9,'Blues')
ms$col    <-    rep(            cols[1], dim(ms)[1])
    ms$col[ms$pi.scale < 0.7] <-    cols[2]
    ms$col[ms$pi.scale < 0.6] <-    cols[3]
    ms$col[ms$pi.scale < 0.5] <-    cols[4]
    ms$col[ms$pi.scale < 0.4] <-    cols[5]
    ms$col[ms$pi.scale < 0.3] <-    cols[6]
    ms$col[ms$pi.scale < 0.2] <-    cols[7]
Mb.axis    <-    2 # y position to start Mb axis
cm.top    <-    1.75 # y position to be top (bottom) of cM-based pi scan
ms$pi.Mb    <-    ms$pi.scale + Mb.axis
ms$pi.cM    <-    cm.top - ms$pi.scale
xmax        <-    cM.max
Mb.med        <-    (max(ms$Mb, na.rm=T) - min(ms$Mb, na.rm=T)) / 2
cM.med        <-    (max(ms$cM, na.rm=T) - min(ms$cM, na.rm=T)) / 2
Mb.med.glob    <-    Mb.max / 2
cM.med.glob    <-    cM.max / 2
Mb.med.diff    <-    Mb.med.glob - Mb.med
cM.med.diff    <-    cM.med.glob - cM.med
ms$cM.scale    <-    ms$cM + cM.med.diff


# ms$Mb.scale    <-    ms$Mb + Mb.med.diff
# SCALE MB SO THAT MAX(CHR MB) == MAX(LG cM)
    Mb2cM    <-    Mb.max / cM.max
ms$Mb.scale    <-    ms$Mb / Mb2cM
ms$Mb.scale    <-    ms$Mb.scale + (Mb.med.diff / Mb2cM)

plot(0,0, xlim = c(0,xmax), ylim = c(0,3), xlab = '', ylab = '',
    xaxt = 'n', yaxt = 'n', type = 'n')
    axis1    <-    rep(Mb.axis, length(ms$Mb))
    axis2    <-    rep(cm.top, length(ms$Mb))
    segments(x0 = 0, x1 = 0.25, 
        y0 = seq(cm.top-1,cm.top,by=0.1), y1 = seq(cm.top-1,cm.top,by=0.1))
    segments(x0 = 0, x1 = 0.25, 
        y0 = seq(Mb.axis,Mb.axis+1,by=0.1), y1 = seq(Mb.axis,Mb.axis+1,by=0.1))
    segments(x0 = 0, x1 = xmax, y0 = cm.top-1, y1 = cm.top-1)
    segments(x0 = 0, x1 = xmax, y0 = cm.top, y1 = cm.top)
    segments(x0 = 0, x1 = xmax, y0 = Mb.axis, y1 = Mb.axis)
    segments(x0 = 0, x1 = xmax, y0 = Mb.axis+1, y1 = Mb.axis+1)
    segments(x0 = 0, x1 = 0, y0 = cm.top-1, y1 = Mb.axis+1)
    # segments(x0 = 5, x1 = 5, y0 = Mb.axis + 0.75, y1 = Mb.axis+1)
    # segments(x0 = 10, x1 = 10, y0 = Mb.axis + 0.75, y1 = Mb.axis+1)
    # segments(x0 = 5/Mb2cM, x1 = 5/Mb2cM, y0 = cm.top - 1, y1 = cm.top - 0.75)
    # segments(x0 = 10/Mb2cM, x1 = 10/Mb2cM, y0 = cm.top - 1, y1 = cm.top - 0.75)
    segments(x0 = xmax, x1 = xmax, y0 = cm.top-1, y1 = Mb.axis+1)
    # polygon(x = c(ms$Mb,rev(ms$Mb)),
            # y = c(ms$pi.Mb, axis1), col = 'white')
    # polygon(x = c(ms$cM.scale,rev(ms$cM.scale)), 
            # y = c(ms$pi.cM, axis2), col = 'white')
    segments(x0 = ms$cM.scale, x1 = ms$Mb.scale, y0 = cm.top,y1=Mb.axis,
             col = adjustcolor(ms$col, alpha=0.25), lwd = 2)
    segments(x0 = ms$cM.scale, x1 = ms$cM.scale, y0 = ms$pi.cM,y1=cm.top,
             col = ms$col)
    segments(x0 = ms$Mb.scale, x1 = ms$Mb.scale, y0 = ms$pi.Mb,y1=Mb.axis,
             col = ms$col)
    lines(x = ms$Mb.scale, y = ms$pi.Mb)
    lines(x = ms$cM.scale, y = ms$pi.cM)


###~~~~~~~~~~~~~~~~~~~~~~~~~~~~~~~~~~~~~~~~~~~~~~###
###                GENOME-WIDE SUMMARIES             ###
###~~~~~~~~~~~~~~~~~~~~~~~~~~~~~~~~~~~~~~~~~~~~~~###

hist(map.smoov$pi)

###~~~~~~~~~~~~~~~~~~~~~~~~~~~~~~~~~~~~~~~~~~~~~~###
###    PLOT ALL CHROMOSOMES TO INDIVIDUAL FILES     ###
###~~~~~~~~~~~~~~~~~~~~~~~~~~~~~~~~~~~~~~~~~~~~~~###

outdir    <-    "/Users/thom/Dropbox/Shared_with_Bill/0.Dissertation_Chapters/3.Recombination/02.Figures/01.Drafts/phys2genetBTRS/pi/"
suffix    <-    "_PIvsPhysicalAndGenetic.pdf"
width    <-    5
height    <-    5
for (i in 1:21)    {
    chr    <-    i    
    outfile = paste0(outdir,"chr",i,suffix)
    ms    <-    map.smoov[map.smoov$chr == chr,]
    ms$pi.scale    <-    ms$pi / max(map.smoov$pi, na.rm = TRUE)
    cols    <-    heat.colors(7)
    cols    <-    brewer.pal(9,'RdYlBu')
    # cols    <-    brewer.pal(8,'RdYlGn')
    # cols    <-    brewer.pal(9,'Greys')
    # cols    <-    brewer.pal(9,'Blues')
    ms$col    <-    rep(            cols[1], dim(ms)[1])
        ms$col[ms$pi.scale < 0.9] <-    cols[1]
        ms$col[ms$pi.scale < 0.8] <-    cols[2]
        ms$col[ms$pi.scale < 0.7] <-    cols[3]
        ms$col[ms$pi.scale < 0.6] <-    cols[4]
        ms$col[ms$pi.scale < 0.5] <-    cols[5]
        ms$col[ms$pi.scale < 0.4] <-    cols[6]
        ms$col[ms$pi.scale < 0.3] <-    cols[7]
        ms$col[ms$pi.scale < 0.2] <-    cols[8]
    Mb.axis    <-    2 # y position to start Mb axis
    cm.top    <-    1.75 # y position to be top (bottom) of cM-based pi scan
    ms$pi.Mb    <-    ms$pi.scale + Mb.axis
    ms$pi.cM    <-    cm.top - ms$pi.scale
    xmax        <-    cM.max
    Mb.med        <-    (max(ms$Mb, na.rm=T) - min(ms$Mb, na.rm=T)) / 2
    cM.med        <-    (max(ms$cM, na.rm=T) - min(ms$cM, na.rm=T)) / 2
    Mb.med.glob    <-    Mb.max / 2
    cM.med.glob    <-    cM.max / 2
    Mb.med.diff    <-    Mb.med.glob - Mb.med
    cM.med.diff    <-    cM.med.glob - cM.med
    ms$cM.scale    <-    ms$cM + cM.med.diff
    # SCALE MB SO THAT MAX(CHR MB) == MAX(LG cM)
        Mb2cM    <-    Mb.max / cM.max
    ms$Mb.scale    <-    ms$Mb / Mb2cM
    ms$Mb.scale    <-    ms$Mb.scale + (Mb.med.diff / Mb2cM)
    pdf(file=outfile, width = width, height = height)    
    plot(0,0, xlim = c(0,xmax), ylim = c(0,3), xlab = '', ylab = '',
        xaxt = 'n', yaxt = 'n', type = 'n')
        axis1    <-    rep(Mb.axis, length(ms$Mb))
        axis2    <-    rep(cm.top, length(ms$Mb))
        segments(x0 = 0, x1 = 0.25, 
            y0 = seq(cm.top-1,cm.top,by=0.1), y1 = seq(cm.top-1,cm.top,by=0.1))
        segments(x0 = 0, x1 = 0.25, 
            y0 = seq(Mb.axis,Mb.axis+1,by=0.1), y1 = seq(Mb.axis,Mb.axis+1,by=0.1))
        segments(x0 = 0, x1 = xmax, y0 = cm.top-1, y1 = cm.top-1)
        segments(x0 = 0, x1 = xmax, y0 = cm.top, y1 = cm.top)
        segments(x0 = 0, x1 = xmax, y0 = Mb.axis, y1 = Mb.axis)
        segments(x0 = 0, x1 = xmax, y0 = Mb.axis+1, y1 = Mb.axis+1)
        segments(x0 = 0, x1 = 0, y0 = cm.top-1, y1 = Mb.axis+1)
        # segments(x0 = 5, x1 = 5, y0 = Mb.axis + 0.75, y1 = Mb.axis+1)
        # segments(x0 = 10, x1 = 10, y0 = Mb.axis + 0.75, y1 = Mb.axis+1)
        # segments(x0 = 5/Mb2cM, x1 = 5/Mb2cM, y0 = cm.top - 1, y1 = cm.top - 0.75)
        # segments(x0 = 10/Mb2cM, x1 = 10/Mb2cM, y0 = cm.top - 1, y1 = cm.top - 0.75)
        segments(x0 = xmax, x1 = xmax, y0 = cm.top-1, y1 = Mb.axis+1)
        # polygon(x = c(ms$Mb,rev(ms$Mb)),
                # y = c(ms$pi.Mb, axis1), col = 'white')
        # polygon(x = c(ms$cM.scale,rev(ms$cM.scale)), 
                # y = c(ms$pi.cM, axis2), col = 'white')
        segments(x0 = ms$cM.scale, x1 = ms$Mb.scale, y0 = cm.top,y1=Mb.axis,
                 col = adjustcolor(ms$col, alpha=0.25), lwd = 2)
        segments(x0 = ms$cM.scale, x1 = ms$cM.scale, y0 = ms$pi.cM,y1=cm.top,
                 col = ms$col)
        segments(x0 = ms$Mb.scale, x1 = ms$Mb.scale, y0 = ms$pi.Mb,y1=Mb.axis,
                 col = ms$col)
        lines(x = ms$Mb.scale, y = ms$pi.Mb)
        lines(x = ms$cM.scale, y = ms$pi.cM)
    dev.off()
}


###~~~~~~~~~~~~~~~~~~~~~~~~~~~~~~~~~~~~~~~~~~~~~~~~~~~~~~~~~~~~~~~~~~~~~~~~~~~~~###
###~~~~~~~~~~~~~~~~~~~~~~~~~~~~~~~~~~~~~~~~~~~~~~~~~~~~~~~~~~~~~~~~~~~~~~~~~~~~~###
###~~~~~~~~~~~~~~~~~~~~~~~~~~~~~~~~~~~~~~~~~~~~~~~~~~~~~~~~~~~~~~~~~~~~~~~~~~~~~###
###~~~~~~~~~~~~~~~~~~~~~~~~~~~~~~~~~~~DISTANCE~~~~~~~~~~~~~~~~~~~~~~~~~~~~~~~~~~###
###~~~~~~~~~~~~~~~~~~~~~~~~~~~~~~~~~~~~~DECAY~~~~~~~~~~~~~~~~~~~~~~~~~~~~~~~~~~~###
###~~~~~~~~~~~~~~~~~~~~~~~~~~~~~~~~~~~~~~~~~~~~~~~~~~~~~~~~~~~~~~~~~~~~~~~~~~~~~###
###~~~~~~~~~~~~~~~~~~~~~~~~~~~~~~~~~~~~~~~~~~~~~~~~~~~~~~~~~~~~~~~~~~~~~~~~~~~~~###
###~~~~~~~~~~~~~~~~~~~~~~~~~~~~~~~~~~~~~~~~~~~~~~~~~~~~~~~~~~~~~~~~~~~~~~~~~~~~~###
###~~~~~~~~~~~~~~~~~~~~~~~~~~~~~~~~~~~~~~~~~~~~~~~~~~~~~~~~~~~~~~~~~~~~~~~~~~~~~###

library(hexbin)
library(RColorBrewer)

popgen    <-    read.table(paste0(baseDIR,
                    "/4.data/1.datasets/polymorphism.tsv"), 
                    sep = "\t", stringsAsFactors = FALSE, header = TRUE)
    popgen        <-    popgen[popgen$chr %in% as.character(1:21),]
    popgen$Mb     <-    popgen$bp / 1000000
    chr           <-    as.character(popgen$chr)
    bp            <-    as.character(popgen$bp)
    coord         <-    paste0(chr,"_",bp)
    popgen$coord  <-    coord
    popgen        <-    popgen[order(popgen$chr, popgen$bp),]
    popgen$fst.rsbt[popgen$fst.rsbt > 1]  <- 0

	length(popgen$bp)
	length(popgen$bp[popgen$cM.bt.interp == -1])
	length(popgen$bp[popgen$cM.rs.interp == -1])
	length(popgen$bp[popgen$cM.h.interp == -1])
	length(popgen$bp[popgen$cM.bt.interp == -1 | 
	                 popgen$cM.rs.interp == -1 | 
	                 popgen$cM.h.interp == -1])

    popgen        <-    popgen[popgen$cM.bt.interp != -1 & 
                               popgen$cM.rs.interp != -1 &
                               popgen$cM.h.interp  != -1 ,]


# BY PHYSICAL DISTANCE TO A DIVERGENT LOCUS

sorted		<-	popgen[popgen$cons.sort != 'N' & 
                       is.na(popgen$pi) == FALSE &
                       is.na(popgen$dist2d) == FALSE &
                       popgen$chr != 19,]
sorted.neu	<-	sorted[sorted$cons.sort != 'D',]
sorted.neu	<-	sorted.neu[sorted.neu$dist2d < 50000,]
d			<-	sorted[sorted$cons.sort == "D",]
n.d			<-	dim(d)[1]
pi      	<-	mean(d$pi, na.rm=T)
pi.bt		<-	mean(d$pi.bt, na.rm=T)
pi.rs		<-	mean(d$pi.rs, na.rm=T)
dxy			<-	mean(d$dxy.rsbt, na.rm=T)
tmrca		<-	mean(d$threespine.scaled, na.rm=T)
d.mean		<-	data.frame(pi,pi.bt,pi.rs,dxy,tmrca)

pi.cor	    <-	cor.test(sorted.neu$dist2d, sorted.neu$pi, method = 'spearman')
bt.cor	    <-	cor.test(sorted.neu$dist2d, sorted.neu$pi.bt, method = 'spearman')
rs.cor	    <-	cor.test(sorted.neu$dist2d, sorted.neu$pi.rs, method = 'spearman')
dxy.cor	    <-	cor.test(sorted.neu$dist2d, sorted.neu$dxy, method = 'spearman')
tmrca.cor	<-	cor.test(sorted.neu$dist2d, sorted.neu$threespine.scaled, method = 'spearman')


# PLOT PI

xmax	<-	2000
ymax	<-	0.020
xbins	<-	xmax / 50
shape	<-	2

	x			<-	sorted.neu$dist2d
	y			<-	sorted.neu$pi
	data		<-	data.frame(x,y)
	data.lim	<-	data[data$x <= xmax & data$y <= ymax,]
	h			<-	hexbin(data.lim, xbins = xbins, shape = shape)
	gplot.hexbin(h, xlab = 'Distance to divergent locus, kb', ylab = "pi")
	gplot.hexbin(h, xlab = 'Distance to divergent locus, kb', ylab = "pi",
		maxcnt=200, colorcut = 15)

# PLOT DXY

xmax	<-	2000
ymax	<-	0.020
xbins	<-	xmax / 50
shape	<-	2

	x			<-	sorted.neu$dist2d
	y			<-	sorted.neu$dxy.rsbt
	data		<-	data.frame(x,y)
	data.lim	<-	data[data$x <= xmax & data$y <= ymax,]
	h			<-	hexbin(data.lim, xbins = xbins, shape = shape)
	gplot.hexbin(h, xlab = 'Distance to divergent locus, kb', ylab = "dxy")
	gplot.hexbin(h, xlab = 'Distance to divergent locus, kb', ylab = "dxy",
		maxcnt=200, colorcut = 15)


# SPLINES W/ PHYSICAL DISTANCE

splinemethod	<-	"natural"
df				<-	40
	plot(smooth.spline(sorted.neu$dist2d, sorted.neu$pi, df = df), 
			xlim = c(0,xmax), ylim = c(0,0.006), xaxt = "n", yaxt = "n",
			type = 'l', xlab = "", ylab = "", lwd = 2)
		axis(1, at = seq(0,2000,by=500))
		axis(2, at = seq(0,0.006,by=0.001))
		abline(h = mean(sorted.neu$pi), lty = 'dotted')
		abline(h = mean(sorted.neu$pi.bt), lty = 'dotted', col = 'blue3')
		abline(h = mean(sorted.neu$pi.rs), lty = 'dotted', col = 'red3')
		lines(smooth.spline(sorted.neu$dist2d, sorted.neu$pi.rs, df = df), 
			col = 'red3', lwd = 2)
		lines(smooth.spline(sorted.neu$dist2d, sorted.neu$pi.bt, df = df), 
			col = 'blue3')
		mtext("Distance to divergent locus, kb", side = 1, line = 3)
		mtext("pi per site", side = 2, line = 3)

splinemethod	<-	"natural"
df				<-	40
	plot(smooth.spline(sorted.neu$dist2d, sorted.neu$threespine.scaled, df = df), 
			xlim = c(0,xmax), ylim = c(0,8), xaxt = "n", yaxt = "n",
			type = 'l', xlab = "", ylab = "", lwd = 2)
		axis(1, at = seq(0,2000,by=500))
		axis(2, at = seq(0,8,by=2))
		mtext("Distance to divergent locus, kb", side = 1, line = 3)
		mtext("Tmrca, MYA", side = 2, line = 3)

# SPLINES W/ GENETIC DISTANCE, BOOT MAP

xmax = 50
splinemethod	<-	"natural"
df				<-	10

	plot(smooth.spline(sorted.neu$cM2D.bt, sorted.neu$pi, df = df), 
			xlim = c(0,xmax), ylim = c(0,0.006), xaxt = "n", yaxt = "n",
			type = 'l', xlab = "", ylab = "", lwd = 2)
		axis(1, at = seq(0,50,by=5))
		axis(2, at = seq(0,0.006,by=0.001))
		abline(h = mean(sorted.neu$pi), lty = 'dotted')
		abline(h = mean(sorted.neu$pi.bt), lty = 'dotted', col = 'blue3')
		abline(h = mean(sorted.neu$pi.rs), lty = 'dotted', col = 'red3')
		lines(smooth.spline(sorted.neu$cM2D.bt, sorted.neu$pi.rs, df = df), 
			col = 'red3', lwd = 2)
		lines(smooth.spline(sorted.neu$cM2D.bt, sorted.neu$pi.bt, df = df), 
			col = 'blue3')
		mtext("Distance to divergent locus, cM (BT)", side = 1, line = 3)
		mtext("pi per site", side = 2, line = 3)

# SPLINES W/ GENETIC DISTANCE, RABBIT MAP

xmax = 50
splinemethod	<-	"natural"
df				<-	10

	plot(smooth.spline(sorted.neu$cM2D.rs, sorted.neu$pi, df = df), 
			xlim = c(0,xmax), ylim = c(0,0.006), xaxt = "n", yaxt = "n",
			type = 'l', xlab = "", ylab = "", lwd = 2)
		axis(1, at = seq(0,50,by=5))
		axis(2, at = seq(0,0.006,by=0.001))
		abline(h = mean(sorted.neu$pi), lty = 'dotted')
		abline(h = mean(sorted.neu$pi.bt), lty = 'dotted', col = 'blue3')
		abline(h = mean(sorted.neu$pi.rs), lty = 'dotted', col = 'red3')
		lines(smooth.spline(sorted.neu$cM2D.rs, sorted.neu$pi.rs, df = df), 
			col = 'red3', lwd = 2)
		lines(smooth.spline(sorted.neu$cM2D.rs, sorted.neu$pi.bt, df = df), 
			col = 'blue3')
		mtext("Distance to divergent locus, cM (RS)", side = 1, line = 3)
		mtext("pi per site", side = 2, line = 3)


# SPLINES W/ GENETIC DISTANCE, HYBRID MAP

xmax = 50
splinemethod	<-	"natural"
df				<-	10

	plot(smooth.spline(sorted.neu$cM2D.h, sorted.neu$pi, df = df), 
			xlim = c(0,xmax), ylim = c(0,0.006), xaxt = "n", yaxt = "n",
			type = 'l', xlab = "", ylab = "", lwd = 2)
		axis(1, at = seq(0,50,by=5))
		axis(2, at = seq(0,0.006,by=0.001))
		abline(h = mean(sorted.neu$pi), lty = 'dotted')
		abline(h = mean(sorted.neu$pi.bt), lty = 'dotted', col = 'blue3')
		abline(h = mean(sorted.neu$pi.rs), lty = 'dotted', col = 'red3')
		lines(smooth.spline(sorted.neu$cM2D.h, sorted.neu$pi.rs, df = df), 
			col = 'red3', lwd = 2)
		lines(smooth.spline(sorted.neu$cM2D.h, sorted.neu$pi.bt, df = df), 
			col = 'blue3')
		mtext("Distance to divergent locus, cM (BT)", side = 1, line = 3)
		mtext("pi per site", side = 2, line = 3)


data <- sorted.neu[order(sorted.neu$cM2D.h),]
hist(data$cM2D.h)
data <- data[data$cM2D.h <= 50, ]
plot(ksmooth(data$cM2D.h, data$threespine.scaled, kernel = 'normal', bandwidth = 1), type = 'l', xlab = "Distance to a divergent locus, cM (hybrid)", ylab = 'Tmrca, MYA', ylim = c(0,8))
plot(ksmooth(data$cM2D.h, data$pi, kernel = 'normal', bandwidth = 1), type = 'l',
     xlab = "Distance to a divergent locus, cM (hybrid)", ylab = 'pi', ylim = c(0,0.01))
plot(ksmooth(data$cM2D.h, data$dxy.rsbt, kernel = 'normal', bandwidth = 1), type = 'l',
     xlab = "Distance to a divergent locus, cM (hybrid)", ylab = 'DXY', ylim = c(0,0.01))

data <- sorted.neu[order(sorted.neu$dist2d),]
hist(data$dist2d)
data <- data[data$dist2d <= 10000, ]
plot(ksmooth(data$dist2d, data$threespine.scaled, kernel = 'normal', bandwidth = 250), type = 'l',
     xlab = "Distance to a divergent locus, kb", ylab = 'Tmrca, MYA', ylim = c(0,8))
plot(ksmooth(data$dist2d, data$pi, kernel = 'normal', bandwidth = 250), type = 'l',
     xlab = "Distance to a divergent locus, kb", ylab = 'pi', ylim = c(0,0.01))
plot(ksmooth(data$dist2d, data$dxy.rsbt, kernel = 'normal', bandwidth = 250), type = 'l',
     xlab = "Distance to a divergent locus, kb", ylab = 'DXY', ylim = c(0,0.01))


data <- sorted.neu[order(sorted.neu$cM2D.bt),]
hist(data$cM2D.bt)
data <- data[data$cM2D.bt <= 50, ]
plot(ksmooth(data$cM2D.bt, data$threespine.scaled, kernel = 'normal', bandwidth = 1), type = 'l', xlab = "Distance to a divergent locus, cM (hybrid)", ylab = 'Tmrca, MYA', ylim = c(0,8))
plot(ksmooth(data$cM2D.bt, data$pi, kernel = 'normal', bandwidth = 1), type = 'l',
     xlab = "Distance to a divergent locus, cM (hybrid)", ylab = 'pi', ylim = c(0,0.01))
plot(ksmooth(data$cM2D.bt, data$dxy.rsbt, kernel = 'normal', bandwidth = 1), type = 'l',
     xlab = "Distance to a divergent locus, cM (hybrid)", ylab = 'DXY', ylim = c(0,0.01))


data <- sorted.neu[order(sorted.neu$cM2D.rs),]
hist(data$cM2D.rs)
data <- data[data$cM2D.rs <= 50, ]
plot(ksmooth(data$cM2D.rs, data$threespine.scaled, kernel = 'normal', bandwidth = 1), type = 'l', xlab = "Distance to a divergent locus, cM (hybrid)", ylab = 'Tmrca, MYA', ylim = c(0,8))
plot(ksmooth(data$cM2D.rs, data$pi, kernel = 'normal', bandwidth = 1), type = 'l',
     xlab = "Distance to a divergent locus, cM (hybrid)", ylab = 'pi', ylim = c(0,0.01))
plot(ksmooth(data$cM2D.rs, data$dxy.rsbt, kernel = 'normal', bandwidth = 1), type = 'l',
     xlab = "Distance to a divergent locus, cM (hybrid)", ylab = 'DXY', ylim = c(0,0.01))


######################################################
######################################################
######################################################
######################################################
######################################################
######################################################
######################################################
######################################################
######################################################

# INTERPOLATE GENETIC POSITIONS FOR POPGEN DATASET
#   IF A PSTI RADTAG FALLS OUTSIDE THE MAPPING REGION, ASSIGN -1
#   ELSE, PREDICT CM POSITION BASED ON LINEAR FUNCTION CONNECTING
#   NEAREST TWO MARKERS IN MAP.
#      ASSUMES NO ERROR IN MAP POSITION (DEFINED IN LEPMAP)

n.loci <- dim(popgen)[1]

cM.bt.interp <- rep(-1, n.loci)
cM.rs.interp <- rep(-1, n.loci)
cM.h.interp <- rep(-1, n.loci)

cat("\n")
for (i in 1:n.loci) {
	# i = 100
	if (i %% 500 == 0) {cat(paste0("interpolating the ",i,"th RAD-tag...\r"))}
	chrom  <- popgen$chr[i]
	pos    <- popgen$bp[i]
	
	map.bt       <- maps[maps$map == "Bt_Subset" & maps$chr == chrom,]
	map.bt$dist  <- map.bt$bp - pos
	map.bt       <- map.bt[order(abs(map.bt$dist)),]

	map.rs       <- maps[maps$map == "RS" & maps$chr == chrom,]
	map.rs$dist  <- map.rs$bp - pos
	map.rs       <- map.rs[order(abs(map.rs$dist)),]

	map.h        <- maps[maps$map == "Hybrid_Subset" & maps$chr == chrom,]
	map.h$dist   <- map.h$bp - pos
	map.h        <- map.h[order(abs(map.h$dist)),]

   # CONTINUE IF RADTAG WITHIN MAPPING RANGE
   #  NEED TO MAKE THIS FIND CLOSEST *LESS-THAN* AND CLOSEST *GREATER-THAN*
   m <- map.bt
   m.range <- range(m$bp)
   if (pos >= m.range[1] & pos <= m.range[2]) {
   	   below   <- m[m$dist < 0,] ; below <- below[below$dist == max(below$dist),]
   	   above   <- m[m$dist > 0,] ; above <- above[above$dist == min(above$dist),]
   	   bracket <- rbind(below,above)
       lm.line <- lm(cM ~ bp, data = bracket)
       coeff   <- lm.line$coefficients
       cM.pred <- (coeff[2] * pos) + coeff[1]
       cM.bt.interp[i] <- cM.pred
   }
   m <- map.rs
   m.range <- range(m$bp)
   if (pos >= m.range[1] & pos <= m.range[2]) {
   	   below   <- m[m$dist < 0,] ; below <- below[below$dist == max(below$dist),]
   	   above   <- m[m$dist > 0,] ; above <- above[above$dist == min(above$dist),]
   	   bracket <- rbind(below,above)
       lm.line <- lm(cM ~ bp, data = bracket)
       coeff   <- lm.line$coefficients
       cM.pred <- (coeff[2] * pos) + coeff[1]
       cM.rs.interp[i] <- cM.pred
   }
   m <- map.h
   m.range <- range(m$bp)
   if (pos >= m.range[1] & pos <= m.range[2]) {
   	   below   <- m[m$dist < 0,] ; below <- below[below$dist == max(below$dist),]
   	   above   <- m[m$dist > 0,] ; above <- above[above$dist == min(above$dist),]
   	   bracket <- rbind(below,above)
       lm.line <- lm(cM ~ bp, data = bracket)
       coeff   <- lm.line$coefficients
       cM.pred <- (coeff[2] * pos) + coeff[1]
       cM.h.interp[i] <- cM.pred
   }
}
cat("\n")
popgen$cM.bt.interp <- cM.bt.interp
popgen$cM.rs.interp <- cM.rs.interp
popgen$cM.h.interp <- cM.h.interp

# test a chromosome

chromosome <- 21

plot(maps$Mb[maps$chr == chromosome & maps$map == "Bt_Subset"], maps$cM[maps$chr == chromosome & maps$map == "Bt_Subset"], pch = 20, col = rgb(0,0,0,0.1))
    points(popgen$Mb[popgen$chr == chromosome], cM.bt.interp[popgen$chr == chromosome], pch = 20, col = 'red')
    points(maps$Mb[maps$chr == chromosome & maps$map == "Bt_Subset"], maps$cM[maps$chr == chromosome & maps$map == "Bt_Subset"], pch = 20, col = rgb(0,0,0,0.1))

# write to table

write.table(popgen, paste0(baseDIR,"/4.data/1.datasets/polymorphism_withInterpolation.tsv"), 
            sep = '\t', row.names=F, col.names = T, quote=F)

# OTHER USEFUL DATASETS
